# Supplementary material
Source: publisher site journal article supplement (https://www.dovepress.com/article/supplementary_file/607682/607682%20Revised%20Supplementary%20Material.docx)
Supplement: Supplementary file 1 [file 607682%20Revised%20Supplementary%20Material.docx]

| **Supplemental Table 1**. Overall and sex-stratified cardiovascular disease–related mortality among adults with amyloidosis in the United States, 1999–2023 | | | | | | | | | | | |
| --- | --- | --- | --- | --- | --- | --- | --- | --- | --- | --- | --- |
| **Sex** | **Year** | **Deaths (n)** | **AAMR** | **95% CI Lower** | **95% CI Upper** | **SE** |  |  |  |  |  |
| Female | 1999 | 351 | 0.62 | 0.56 | 0.69 | 0.03 |  |  |  |  |  |
| Female | 2000 | 411 | 0.77 | 0.69 | 0.84 | 0.04 |  |  |  |  |  |
| Female | 2001 | 349 | 0.61 | 0.55 | 0.67 | 0.03 |  |  |  |  |  |
| Female | 2002 | 401 | 0.70 | 0.63 | 0.77 | 0.04 |  |  |  |  |  |
| Female | 2003 | 400 | 0.68 | 0.62 | 0.75 | 0.03 |  |  |  |  |  |
| Female | 2004 | 365 | 0.62 | 0.56 | 0.68 | 0.03 |  |  |  |  |  |
| Female | 2005 | 382 | 0.65 | 0.59 | 0.72 | 0.03 |  |  |  |  |  |
| Female | 2006 | 354 | 0.56 | 0.51 | 0.62 | 0.03 |  |  |  |  |  |
| Female | 2007 | 363 | 0.57 | 0.51 | 0.63 | 0.03 |  |  |  |  |  |
| Female | 2008 | 436 | 0.68 | 0.62 | 0.75 | 0.03 |  |  |  |  |  |
| Female | 2009 | 426 | 0.66 | 0.60 | 0.73 | 0.03 |  |  |  |  |  |
| Female | 2010 | 401 | 0.60 | 0.54 | 0.66 | 0.03 |  |  |  |  |  |
| Female | 2011 | 401 | 0.59 | 0.53 | 0.65 | 0.03 |  |  |  |  |  |
| Female | 2012 | 437 | 0.62 | 0.56 | 0.68 | 0.03 |  |  |  |  |  |
| Female | 2013 | 456 | 0.66 | 0.60 | 0.72 | 0.03 |  |  |  |  |  |
| Female | 2014 | 539 | 0.73 | 0.67 | 0.80 | 0.03 |  |  |  |  |  |
| Female | 2015 | 562 | 0.76 | 0.70 | 0.82 | 0.03 |  |  |  |  |  |
| Female | 2016 | 576 | 0.78 | 0.71 | 0.84 | 0.03 |  |  |  |  |  |
| Female | 2017 | 611 | 0.79 | 0.73 | 0.86 | 0.03 |  |  |  |  |  |
| Female | 2018 | 668 | 0.84 | 0.77 | 0.90 | 0.03 |  |  |  |  |  |
| Female | 2019 | 723 | 0.90 | 0.83 | 0.96 | 0.03 |  |  |  |  |  |
| Female | 2020 | 876 | 1.04 | 0.97 | 1.11 | 0.04 |  |  |  |  |  |
| Female | 2021 | 986 | 1.25 | 1.17 | 1.33 | 0.04 |  |  |  |  |  |
| Female | 2022 | 1067 | 1.25 | 1.17 | 1.33 | 0.04 |  |  |  |  |  |
| Female | 2023 | 1218 | 1.42 | 1.34 | 1.50 | 0.04 |  |  |  |  |  |
| Male | 1999 | 409 | 1.06 | 0.95 | 1.16 | 0.05 |  |  |  |  |  |
| Male | 2000 | 427 | 1.05 | 0.95 | 1.16 | 0.05 |  |  |  |  |  |
| Male | 2001 | 465 | 1.15 | 1.05 | 1.26 | 0.05 |  |  |  |  |  |
| Male | 2002 | 478 | 1.13 | 1.02 | 1.23 | 0.05 |  |  |  |  |  |
| Male | 2003 | 455 | 1.09 | 0.99 | 1.20 | 0.05 |  |  |  |  |  |
| Male | 2004 | 427 | 1.01 | 0.91 | 1.11 | 0.05 |  |  |  |  |  |
| Male | 2005 | 466 | 1.06 | 0.96 | 1.16 | 0.05 |  |  |  |  |  |
| Male | 2006 | 510 | 1.10 | 1.00 | 1.19 | 0.05 |  |  |  |  |  |
| Male | 2007 | 526 | 1.18 | 1.08 | 1.29 | 0.05 |  |  |  |  |  |
| Male | 2008 | 548 | 1.18 | 1.08 | 1.28 | 0.05 |  |  |  |  |  |
| Male | 2009 | 557 | 1.16 | 1.06 | 1.25 | 0.05 |  |  |  |  |  |
| Male | 2010 | 600 | 1.25 | 1.15 | 1.35 | 0.05 |  |  |  |  |  |
| Male | 2011 | 639 | 1.28 | 1.18 | 1.38 | 0.05 |  |  |  |  |  |
| Male | 2012 | 643 | 1.24 | 1.14 | 1.34 | 0.05 |  |  |  |  |  |
| Male | 2013 | 693 | 1.31 | 1.21 | 1.40 | 0.05 |  |  |  |  |  |
| Male | 2014 | 746 | 1.39 | 1.29 | 1.49 | 0.05 |  |  |  |  |  |
| Male | 2015 | 851 | 1.51 | 1.41 | 1.62 | 0.05 |  |  |  |  |  |
| Male | 2016 | 943 | 1.67 | 1.56 | 1.78 | 0.06 |  |  |  |  |  |
| Male | 2017 | 1012 | 1.74 | 1.63 | 1.85 | 0.06 |  |  |  |  |  |
| Male | 2018 | 1172 | 1.96 | 1.85 | 2.08 | 0.06 |  |  |  |  |  |
| Male | 2019 | 1349 | 2.23 | 2.11 | 2.35 | 0.06 |  |  |  |  |  |
| Male | 2020 | 1598 | 2.59 | 2.46 | 2.72 | 0.07 |  |  |  |  |  |
| Male | 2021 | 1804 | 3.07 | 2.93 | 3.22 | 0.07 |  |  |  |  |  |
| Male | 2022 | 1995 | 3.23 | 3.09 | 3.38 | 0.07 |  |  |  |  |  |
| Male | 2023 | 2150 | 3.43 | 3.28 | 3.58 | 0.08 |  |  |  |  |  |
| Overall | 1999 | 760 | 0.80 | 0.74 | 0.86 | 0.03 |  |  |  |  |  |
| Overall | 2000 | 838 | 0.87 | 0.81 | 0.93 | 0.03 |  |  |  |  |  |
| Overall | 2001 | 814 | 0.81 | 0.76 | 0.87 | 0.03 |  |  |  |  |  |
| Overall | 2002 | 879 | 0.88 | 0.82 | 0.94 | 0.03 |  |  |  |  |  |
| Overall | 2003 | 855 | 0.88 | 0.82 | 0.94 | 0.03 |  |  |  |  |  |
| Overall | 2004 | 792 | 0.77 | 0.71 | 0.82 | 0.03 |  |  |  |  |  |
| Overall | 2005 | 848 | 0.79 | 0.74 | 0.84 | 0.03 |  |  |  |  |  |
| Overall | 2006 | 864 | 0.82 | 0.77 | 0.88 | 0.03 |  |  |  |  |  |
| Overall | 2007 | 889 | 0.79 | 0.74 | 0.84 | 0.03 |  |  |  |  |  |
| Overall | 2008 | 984 | 0.86 | 0.81 | 0.92 | 0.03 |  |  |  |  |  |
| Overall | 2009 | 983 | 0.85 | 0.79 | 0.90 | 0.03 |  |  |  |  |  |
| Overall | 2010 | 1001 | 0.86 | 0.80 | 0.91 | 0.03 |  |  |  |  |  |
| Overall | 2011 | 1040 | 0.86 | 0.81 | 0.92 | 0.03 |  |  |  |  |  |
| Overall | 2012 | 1080 | 0.86 | 0.81 | 0.92 | 0.03 |  |  |  |  |  |
| Overall | 2013 | 1149 | 0.96 | 0.90 | 1.02 | 0.03 |  |  |  |  |  |
| Overall | 2014 | 1285 | 0.99 | 0.93 | 1.04 | 0.03 |  |  |  |  |  |
| Overall | 2015 | 1413 | 1.12 | 1.06 | 1.18 | 0.03 |  |  |  |  |  |
| Overall | 2016 | 1519 | 1.14 | 1.09 | 1.20 | 0.03 |  |  |  |  |  |
| Overall | 2017 | 1623 | 1.23 | 1.16 | 1.29 | 0.03 |  |  |  |  |  |
| Overall | 2018 | 1840 | 1.31 | 1.25 | 1.37 | 0.03 |  |  |  |  |  |
| Overall | 2019 | 2072 | 1.45 | 1.39 | 1.51 | 0.03 |  |  |  |  |  |
| Overall | 2020 | 2474 | 1.74 | 1.67 | 1.80 | 0.04 |  |  |  |  |  |
| Overall | 2021 | 2790 | 2.00 | 1.92 | 2.07 | 0.04 |  |  |  |  |  |
| Overall | 2022 | 3062 | 2.07 | 2.00 | 2.14 | 0.04 |  |  |  |  |  |
| Overall | 2023 | 3368 | 2.27 | 2.19 | 2.34 | 0.04 |  |  |  |  |  |
| Abbreviations: AAMR, age-adjusted mortality rate; CVD, cardiovascular disease; CI, confidence interval; | | | | | | | | |  |  |  |
| SE, standard error. | | | | | | |  |  |  |  |  |
| Note: AAMRs are per 100,000 population, age-adjusted to the 2000 U.S. standard population. | | | | | | |  |  |  |  |  |

| **Supplemental Table 2**. Joinpoint regression analysis of temporal trends in age-adjusted cardiovascular disease–related mortality among adults with amyloidosis in the United States, 1999–2023 | | | | | | | | | |
| --- | --- | --- | --- | --- | --- | --- | --- | --- | --- |
| **Classification** | **Variable** | **Start** | **End** | **APC** | **95% CI Lower** | **95% CI Upper** | ***P* value** |  |  |
| Census Region | Midwest | 1999 | 2012 | 0.13 | -1.78 | 1.56 | 0.88 |  |  |
| Census Region | Midwest | 2012 | 2023 | 9.35 | 8.08 | 11.27 | <0.001 |  |  |
| Census Region | Northeast | 1999 | 2013 | 2.21 | 0.60 | 3.45 | 0.02 |  |  |
| Census Region | Northeast | 2013 | 2023 | 9.45 | 8.16 | 11.46 | <0.001 |  |  |
| Census Region | South | 1999 | 2014 | -0.23 | -1.27 | 0.69 | 0.63 |  |  |
| Census Region | South | 2014 | 2023 | 11.25 | 9.88 | 13.15 | <0.001 |  |  |
| Census Region | West | 1999 | 2014 | 0.90 | -0.13 | 1.79 | 0.08 |  |  |
| Census Region | West | 2014 | 2023 | 10.56 | 9.31 | 12.28 | <0.001 |  |  |
| Race | Hispanic | 1999 | 2016 | 1.21 | -6.97 | 3.46 | 0.47 |  |  |
| Race | Hispanic | 2016 | 2023 | 10.64 | 5.61 | 28.17 | <0.001 |  |  |
| Race | NH Black | 1999 | 2012 | 1.28 | -0.49 | 2.69 | 0.14 |  |  |
| Race | NH Black | 2012 | 2023 | 9.92 | 8.78 | 11.55 | <0.001 |  |  |
| Race | NH White | 1999 | 2011 | 0.11 | -2.45 | 1.01 | 0.90 |  |  |
| Race | NH White | 2011 | 2017 | 5.89 | 1.48 | 9.15 | 0.01 |  |  |
| Race | NH White | 2017 | 2023 | 12.02 | 10.36 | 16.43 | <0.001 |  |  |
| Sex | Overall | 1999 | 2011 | 0.14 | -1.45 | 2.23 | 0.75 |  |  |
| Sex | Overall | 2011 | 2018 | 6.41 | -1.64 | 8.13 | 0.09 |  |  |
| Sex | Overall | 2018 | 2021 | 15.04 | 5.37 | 17.34 | <0.001 |  |  |
| Sex | Overall | 2021 | 2023 | 6.65 | 3.19 | 11.86 | <0.001 |  |  |
| Sex | Female | 1999 | 2011 | -0.89 | -7.10 | 7.77 | 0.23 |  |  |
| Sex | Female | 2011 | 2018 | 4.82 | -5.45 | 9.24 | 0.16 |  |  |
| Sex | Female | 2018 | 2023 | 11.11 | 7.21 | 18.93 | 0.01 |  |  |
| Sex | Male | 1999 | 2004 | -0.49 | -5.24 | 5.99 | 0.60 |  |  |
| Sex | Male | 2004 | 2013 | 2.20 | -1.09 | 5.61 | 0.09 |  |  |
| Sex | Male | 2013 | 2018 | 8.17 | 2.99 | 10.90 | 0.02 |  |  |
| Sex | Male | 2018 | 2021 | 16.56 | 13.40 | 19.01 | <0.001 |  |  |
| Sex | Male | 2021 | 2023 | 6.02 | 2.18 | 10.18 | <0.001 |  |  |
| State | California | 1999 | 2014 | -0.15 | -1.44 | 0.92 | 0.76 |  |  |
| State | California | 2014 | 2023 | 9.56 | 7.87 | 11.90 | <0.001 |  |  |
| State | Florida | 1999 | 2015 | 1.13 | -0.86 | 2.67 | 0.21 |  |  |
| State | Florida | 2015 | 2023 | 12.71 | 9.99 | 17.11 | <0.001 |  |  |
| State | Illinois | 1999 | 2009 | -3.90 | -16.66 | 0.76 | 0.10 |  |  |
| State | Illinois | 2009 | 2023 | 8.04 | 5.93 | 13.35 | <0.001 |  |  |
| State | New York | 1999 | 2023 | 4.75 | 4.09 | 5.67 | <0.001 |  |  |
| State | Ohio | 1999 | 2007 | -1.54 | -9.84 | 1.95 | 0.36 |  |  |
| State | Ohio | 2007 | 2023 | 6.08 | 5.19 | 7.73 | <0.001 |  |  |
| State | Pennsylvania | 1999 | 2014 | 1.78 | -1.31 | 3.99 | 0.17 |  |  |
| State | Pennsylvania | 2014 | 2023 | 14.66 | 11.69 | 19.87 | <0.001 |  |  |
| State | Texas | 1999 | 2015 | -1.20 | -5.44 | 1.02 | 0.26 |  |  |
| State | Texas | 2015 | 2023 | 11.17 | 6.49 | 25.23 | <0.001 |  |  |
| Urbanization | Medium/small metropolitan | 1999 | 2013 | 0.35 | -0.37 | 1.01 | 0.30 |  |  |
| Urbanization | Medium/small metropolitan | 2013 | 2020 | 10.05 | 8.72 | 11.87 | <0.001 |  |  |
| Urbanization | Large metropolitan | 1999 | 2007 | -0.83 | -4.44 | 0.79 | 0.30 |  |  |
| Urbanization | Large metropolitan | 2007 | 2018 | 4.54 | 3.05 | 5.77 | <0.001 |  |  |
| Urbanization | Large metropolitan | 2018 | 2020 | 16.18 | 8.73 | 20.27 | <0.001 |  |  |
| Urbanization | Rural counties | 1999 | 2012 | -0.25 | -3.16 | 1.39 | 0.68 |  |  |
| Urbanization | Rural counties | 2012 | 2020 | 7.29 | 4.77 | 13.47 | <0.001 |  |  |
| Age Group | 45-54 years | 1999 | 2023 | 0.13 | -0.57 | 0.83 | 0.71 |  |  |
| Age Group | 55-64 years | 1999 | 2023 | 0.41 | -0.09 | 0.99 | 0.11 |  |  |
| Age Group | 65-74 years | 1999 | 2001 | 9.17 | -2.09 | 18.37 | 0.08 |  |  |
| Age Group | 65-74 years | 2001 | 2005 | -6.61 | -11.06 | 2.30 | 0.08 |  |  |
| Age Group | 65-74 years | 2005 | 2017 | 1.90 | 0.36 | 3.39 | 0.04 |  |  |
| Age Group | 65-74 years | 2017 | 2023 | 6.83 | 5.19 | 10.55 | <0.001 |  |  |
| Age Group | 75-84 years | 1999 | 2012 | 2.05 | 0.86 | 3.04 | <0.001 |  |  |
| Age Group | 75-84 years | 2012 | 2023 | 9.29 | 8.46 | 10.44 | <0.001 |  |  |
| Age Group | 85+ years | 1999 | 2013 | 2.07 | -0.61 | 3.80 | 0.08 |  |  |
| Age Group | 85+ years | 2013 | 2018 | 13.64 | 1.38 | 18.93 | 0.04 |  |  |
| Age Group | 85+ years | 2018 | 2021 | 30.32 | 13.97 | 35.08 | <0.001 |  |  |
| Age Group | 85+ years | 2021 | 2023 | 13.82 | 8.39 | 22.48 | <0.001 |  |  |
| Abbreviations: APC, annual percent change; CVD, cardiovascular disease; CI, confidence interval; NH, non-Hispanic; | | | | | | | |  |  |
| Note: Joinpoint regression analysis identified statistically significant temporal changepoints in age-adjusted mortality rates. Each row represents a distinct temporal segment within | | | | | | | | | |
| the overall study period (1999–2023). Start and End indicate the years defining each segment. APC represents the estimated annual percent change in mortality rate for that | | | | | | | | | |
| segment, with 95% confidence intervals and *P* values. Statistical significance was assessed at α = 0.05. Segments with *P* < 0.05 indicate statistically significant trends. | | | | | | | | | |
| Age-adjusted rates are per 100,000 population, standardized to the 2000 U.S. standard population, except for age-specific rates which are crude rates. | | | | | | | | | |

| **Supplemental Table 3**. Annual Age-Specific Crude Cardiovascular Disease–Related Mortality Rates Among Adults With Amyloidosis in the United States, 1999–2023 | | | | | | | | | | | | | |
| --- | --- | --- | --- | --- | --- | --- | --- | --- | --- | --- | --- | --- | --- |
| **Age Group (years)** | **Year** | **Deaths (n)** | **CMR** | **95% CI (Lower)** | **95% CI (Upper)** | **SE** |  |  |  |  |  |  |  |
| 45-54 years | 1999 | 55 | 0.15 | 0.11 | 0.20 | 0.02 |  |  |  |  |  |  |  |
| 45-54 years | 2000 | 74 | 0.20 | 0.15 | 0.25 | 0.02 |  |  |  |  |  |  |  |
| 45-54 years | 2001 | 59 | 0.15 | 0.11 | 0.19 | 0.02 |  |  |  |  |  |  |  |
| 45-54 years | 2002 | 68 | 0.17 | 0.13 | 0.22 | 0.02 |  |  |  |  |  |  |  |
| 45-54 years | 2003 | 68 | 0.17 | 0.13 | 0.21 | 0.02 |  |  |  |  |  |  |  |
| 45-54 years | 2004 | 63 | 0.15 | 0.12 | 0.19 | 0.02 |  |  |  |  |  |  |  |
| 45-54 years | 2005 | 59 | 0.14 | 0.11 | 0.18 | 0.02 |  |  |  |  |  |  |  |
| 45-54 years | 2006 | 73 | 0.17 | 0.13 | 0.21 | 0.02 |  |  |  |  |  |  |  |
| 45-54 years | 2007 | 57 | 0.13 | 0.10 | 0.17 | 0.02 |  |  |  |  |  |  |  |
| 45-54 years | 2008 | 59 | 0.13 | 0.10 | 0.17 | 0.02 |  |  |  |  |  |  |  |
| 45-54 years | 2009 | 66 | 0.15 | 0.11 | 0.19 | 0.02 |  |  |  |  |  |  |  |
| 45-54 years | 2010 | 67 | 0.15 | 0.12 | 0.19 | 0.02 |  |  |  |  |  |  |  |
| 45-54 years | 2011 | 66 | 0.15 | 0.11 | 0.19 | 0.02 |  |  |  |  |  |  |  |
| 45-54 years | 2012 | 65 | 0.15 | 0.11 | 0.19 | 0.02 |  |  |  |  |  |  |  |
| 45-54 years | 2013 | 69 | 0.16 | 0.12 | 0.20 | 0.02 |  |  |  |  |  |  |  |
| 45-54 years | 2014 | 65 | 0.15 | 0.12 | 0.19 | 0.02 |  |  |  |  |  |  |  |
| 45-54 years | 2015 | 69 | 0.16 | 0.12 | 0.20 | 0.02 |  |  |  |  |  |  |  |
| 45-54 years | 2016 | 62 | 0.14 | 0.11 | 0.19 | 0.02 |  |  |  |  |  |  |  |
| 45-54 years | 2017 | 67 | 0.16 | 0.12 | 0.20 | 0.02 |  |  |  |  |  |  |  |
| 45-54 years | 2018 | 51 | 0.12 | 0.09 | 0.16 | 0.02 |  |  |  |  |  |  |  |
| 45-54 years | 2019 | 60 | 0.15 | 0.11 | 0.19 | 0.02 |  |  |  |  |  |  |  |
| 45-54 years | 2020 | 71 | 0.18 | 0.14 | 0.22 | 0.02 |  |  |  |  |  |  |  |
| 45-54 years | 2021 | 88 | 0.22 | 0.17 | 0.27 | 0.02 |  |  |  |  |  |  |  |
| 45-54 years | 2022 | 65 | 0.16 | 0.12 | 0.20 | 0.02 |  |  |  |  |  |  |  |
| 45-54 years | 2023 | 62 | 0.15 | 0.12 | 0.20 | 0.02 |  |  |  |  |  |  |  |
| 55-64 years | 1999 | 106 | 0.45 | 0.36 | 0.53 | 0.04 |  |  |  |  |  |  |  |
| 55-64 years | 2000 | 117 | 0.48 | 0.39 | 0.57 | 0.04 |  |  |  |  |  |  |  |
| 55-64 years | 2001 | 121 | 0.48 | 0.40 | 0.57 | 0.04 |  |  |  |  |  |  |  |
| 55-64 years | 2002 | 145 | 0.54 | 0.45 | 0.63 | 0.05 |  |  |  |  |  |  |  |
| 55-64 years | 2003 | 127 | 0.45 | 0.37 | 0.53 | 0.04 |  |  |  |  |  |  |  |
| 55-64 years | 2004 | 127 | 0.43 | 0.36 | 0.51 | 0.04 |  |  |  |  |  |  |  |
| 55-64 years | 2005 | 150 | 0.49 | 0.41 | 0.57 | 0.04 |  |  |  |  |  |  |  |
| 55-64 years | 2006 | 155 | 0.49 | 0.41 | 0.56 | 0.04 |  |  |  |  |  |  |  |
| 55-64 years | 2007 | 146 | 0.44 | 0.37 | 0.51 | 0.04 |  |  |  |  |  |  |  |
| 55-64 years | 2008 | 170 | 0.50 | 0.42 | 0.57 | 0.04 |  |  |  |  |  |  |  |
| 55-64 years | 2009 | 172 | 0.49 | 0.41 | 0.56 | 0.04 |  |  |  |  |  |  |  |
| 55-64 years | 2010 | 144 | 0.39 | 0.33 | 0.46 | 0.03 |  |  |  |  |  |  |  |
| 55-64 years | 2011 | 158 | 0.42 | 0.35 | 0.48 | 0.03 |  |  |  |  |  |  |  |
| 55-64 years | 2012 | 182 | 0.47 | 0.40 | 0.54 | 0.03 |  |  |  |  |  |  |  |
| 55-64 years | 2013 | 147 | 0.37 | 0.31 | 0.43 | 0.03 |  |  |  |  |  |  |  |
| 55-64 years | 2014 | 178 | 0.44 | 0.38 | 0.51 | 0.03 |  |  |  |  |  |  |  |
| 55-64 years | 2015 | 203 | 0.50 | 0.43 | 0.56 | 0.03 |  |  |  |  |  |  |  |
| 55-64 years | 2016 | 199 | 0.48 | 0.41 | 0.55 | 0.03 |  |  |  |  |  |  |  |
| 55-64 years | 2017 | 195 | 0.46 | 0.40 | 0.53 | 0.03 |  |  |  |  |  |  |  |
| 55-64 years | 2018 | 222 | 0.53 | 0.46 | 0.59 | 0.04 |  |  |  |  |  |  |  |
| 55-64 years | 2019 | 219 | 0.52 | 0.45 | 0.58 | 0.03 |  |  |  |  |  |  |  |
| 55-64 years | 2020 | 196 | 0.46 | 0.40 | 0.53 | 0.03 |  |  |  |  |  |  |  |
| 55-64 years | 2021 | 218 | 0.51 | 0.44 | 0.58 | 0.03 |  |  |  |  |  |  |  |
| 55-64 years | 2022 | 222 | 0.53 | 0.46 | 0.60 | 0.04 |  |  |  |  |  |  |  |
| 55-64 years | 2023 | 225 | 0.54 | 0.47 | 0.61 | 0.04 |  |  |  |  |  |  |  |
| 65-74 years | 1999 | 223 | 1.21 | 1.05 | 1.37 | 0.08 |  |  |  |  |  |  |  |
| 65-74 years | 2000 | 265 | 1.44 | 1.27 | 1.61 | 0.09 |  |  |  |  |  |  |  |
| 65-74 years | 2001 | 262 | 1.43 | 1.25 | 1.60 | 0.09 |  |  |  |  |  |  |  |
| 65-74 years | 2002 | 276 | 1.50 | 1.32 | 1.68 | 0.09 |  |  |  |  |  |  |  |
| 65-74 years | 2003 | 214 | 1.16 | 1.00 | 1.31 | 0.08 |  |  |  |  |  |  |  |
| 65-74 years | 2004 | 232 | 1.24 | 1.08 | 1.40 | 0.08 |  |  |  |  |  |  |  |
| 65-74 years | 2005 | 217 | 1.15 | 1.00 | 1.30 | 0.08 |  |  |  |  |  |  |  |
| 65-74 years | 2006 | 224 | 1.17 | 1.01 | 1.32 | 0.08 |  |  |  |  |  |  |  |
| 65-74 years | 2007 | 219 | 1.11 | 0.96 | 1.26 | 0.08 |  |  |  |  |  |  |  |
| 65-74 years | 2008 | 255 | 1.24 | 1.09 | 1.40 | 0.08 |  |  |  |  |  |  |  |
| 65-74 years | 2009 | 257 | 1.21 | 1.06 | 1.36 | 0.08 |  |  |  |  |  |  |  |
| 65-74 years | 2010 | 278 | 1.28 | 1.13 | 1.43 | 0.08 |  |  |  |  |  |  |  |
| 65-74 years | 2011 | 289 | 1.29 | 1.14 | 1.43 | 0.08 |  |  |  |  |  |  |  |
| 65-74 years | 2012 | 299 | 1.25 | 1.11 | 1.39 | 0.07 |  |  |  |  |  |  |  |
| 65-74 years | 2013 | 331 | 1.31 | 1.17 | 1.45 | 0.07 |  |  |  |  |  |  |  |
| 65-74 years | 2014 | 363 | 1.38 | 1.23 | 1.52 | 0.07 |  |  |  |  |  |  |  |
| 65-74 years | 2015 | 379 | 1.38 | 1.24 | 1.51 | 0.07 |  |  |  |  |  |  |  |
| 65-74 years | 2016 | 398 | 1.39 | 1.25 | 1.53 | 0.07 |  |  |  |  |  |  |  |
| 65-74 years | 2017 | 397 | 1.34 | 1.21 | 1.47 | 0.07 |  |  |  |  |  |  |  |
| 65-74 years | 2018 | 481 | 1.58 | 1.44 | 1.72 | 0.07 |  |  |  |  |  |  |  |
| 65-74 years | 2019 | 492 | 1.56 | 1.42 | 1.70 | 0.07 |  |  |  |  |  |  |  |
| 65-74 years | 2020 | 597 | 1.83 | 1.69 | 1.98 | 0.08 |  |  |  |  |  |  |  |
| 65-74 years | 2021 | 629 | 1.87 | 1.72 | 2.01 | 0.07 |  |  |  |  |  |  |  |
| 65-74 years | 2022 | 657 | 1.94 | 1.80 | 2.09 | 0.08 |  |  |  |  |  |  |  |
| 65-74 years | 2023 | 724 | 2.09 | 1.94 | 2.24 | 0.08 |  |  |  |  |  |  |  |
| 75-84 years | 1999 | 273 | 2.23 | 1.97 | 2.50 | 0.14 |  |  |  |  |  |  |  |
| 75-84 years | 2000 | 272 | 2.20 | 1.94 | 2.46 | 0.13 |  |  |  |  |  |  |  |
| 75-84 years | 2001 | 274 | 2.18 | 1.92 | 2.43 | 0.13 |  |  |  |  |  |  |  |
| 75-84 years | 2002 | 279 | 2.19 | 1.93 | 2.44 | 0.13 |  |  |  |  |  |  |  |
| 75-84 years | 2003 | 319 | 2.47 | 2.20 | 2.74 | 0.14 |  |  |  |  |  |  |  |
| 75-84 years | 2004 | 275 | 2.12 | 1.87 | 2.37 | 0.13 |  |  |  |  |  |  |  |
| 75-84 years | 2005 | 296 | 2.26 | 2.01 | 2.52 | 0.13 |  |  |  |  |  |  |  |
| 75-84 years | 2006 | 277 | 2.12 | 1.87 | 2.36 | 0.13 |  |  |  |  |  |  |  |
| 75-84 years | 2007 | 345 | 2.64 | 2.36 | 2.91 | 0.14 |  |  |  |  |  |  |  |
| 75-84 years | 2008 | 352 | 2.69 | 2.41 | 2.97 | 0.14 |  |  |  |  |  |  |  |
| 75-84 years | 2009 | 344 | 2.64 | 2.36 | 2.92 | 0.14 |  |  |  |  |  |  |  |
| 75-84 years | 2010 | 357 | 2.73 | 2.45 | 3.02 | 0.14 |  |  |  |  |  |  |  |
| 75-84 years | 2011 | 345 | 2.62 | 2.34 | 2.89 | 0.14 |  |  |  |  |  |  |  |
| 75-84 years | 2012 | 351 | 2.64 | 2.37 | 2.92 | 0.14 |  |  |  |  |  |  |  |
| 75-84 years | 2013 | 415 | 3.09 | 2.79 | 3.38 | 0.15 |  |  |  |  |  |  |  |
| 75-84 years | 2014 | 441 | 3.22 | 2.92 | 3.52 | 0.15 |  |  |  |  |  |  |  |
| 75-84 years | 2015 | 515 | 3.70 | 3.38 | 4.02 | 0.16 |  |  |  |  |  |  |  |
| 75-84 years | 2016 | 572 | 4.02 | 3.69 | 4.35 | 0.17 |  |  |  |  |  |  |  |
| 75-84 years | 2017 | 621 | 4.22 | 3.89 | 4.55 | 0.17 |  |  |  |  |  |  |  |
| 75-84 years | 2018 | 682 | 4.43 | 4.10 | 4.76 | 0.17 |  |  |  |  |  |  |  |
| 75-84 years | 2019 | 820 | 5.13 | 4.78 | 5.49 | 0.18 |  |  |  |  |  |  |  |
| 75-84 years | 2020 | 946 | 5.75 | 5.38 | 6.12 | 0.19 |  |  |  |  |  |  |  |
| 75-84 years | 2021 | 1046 | 6.45 | 6.06 | 6.85 | 0.20 |  |  |  |  |  |  |  |
| 75-84 years | 2022 | 1178 | 6.72 | 6.34 | 7.11 | 0.20 |  |  |  |  |  |  |  |
| 75-84 years | 2023 | 1292 | 7.03 | 6.65 | 7.42 | 0.20 |  |  |  |  |  |  |  |
| 85+ years | 1999 | 103 | 2.48 | 2.00 | 2.96 | 0.24 |  |  |  |  |  |  |  |
| 85+ years | 2000 | 110 | 2.59 | 2.11 | 3.08 | 0.25 |  |  |  |  |  |  |  |
| 85+ years | 2001 | 98 | 2.27 | 1.84 | 2.77 | 0.23 |  |  |  |  |  |  |  |
| 85+ years | 2002 | 111 | 2.54 | 2.07 | 3.01 | 0.24 |  |  |  |  |  |  |  |
| 85+ years | 2003 | 127 | 2.84 | 2.35 | 3.34 | 0.25 |  |  |  |  |  |  |  |
| 85+ years | 2004 | 95 | 2.09 | 1.69 | 2.55 | 0.21 |  |  |  |  |  |  |  |
| 85+ years | 2005 | 126 | 2.68 | 2.22 | 3.15 | 0.24 |  |  |  |  |  |  |  |
| 85+ years | 2006 | 135 | 2.77 | 2.31 | 3.24 | 0.24 |  |  |  |  |  |  |  |
| 85+ years | 2007 | 122 | 2.42 | 1.99 | 2.85 | 0.22 |  |  |  |  |  |  |  |
| 85+ years | 2008 | 148 | 2.85 | 2.39 | 3.31 | 0.23 |  |  |  |  |  |  |  |
| 85+ years | 2009 | 144 | 2.68 | 2.24 | 3.12 | 0.22 |  |  |  |  |  |  |  |
| 85+ years | 2010 | 155 | 2.82 | 2.38 | 3.27 | 0.23 |  |  |  |  |  |  |  |
| 85+ years | 2011 | 182 | 3.17 | 2.71 | 3.63 | 0.24 |  |  |  |  |  |  |  |
| 85+ years | 2012 | 183 | 3.11 | 2.66 | 3.56 | 0.23 |  |  |  |  |  |  |  |
| 85+ years | 2013 | 187 | 3.10 | 2.65 | 3.54 | 0.23 |  |  |  |  |  |  |  |
| 85+ years | 2014 | 238 | 3.86 | 3.37 | 4.35 | 0.25 |  |  |  |  |  |  |  |
| 85+ years | 2015 | 247 | 3.93 | 3.44 | 4.42 | 0.25 |  |  |  |  |  |  |  |
| 85+ years | 2016 | 288 | 4.51 | 3.99 | 5.04 | 0.27 |  |  |  |  |  |  |  |
| 85+ years | 2017 | 343 | 5.30 | 4.74 | 5.86 | 0.29 |  |  |  |  |  |  |  |
| 85+ years | 2018 | 404 | 6.17 | 5.57 | 6.78 | 0.31 |  |  |  |  |  |  |  |
| 85+ years | 2019 | 481 | 7.28 | 6.63 | 7.93 | 0.33 |  |  |  |  |  |  |  |
| 85+ years | 2020 | 664 | 9.97 | 9.21 | 10.73 | 0.39 |  |  |  |  |  |  |  |
| 85+ years | 2021 | 809 | 13.54 | 12.61 | 14.47 | 0.48 |  |  |  |  |  |  |  |
| 85+ years | 2022 | 940 | 14.49 | 13.57 | 15.42 | 0.47 |  |  |  |  |  |  |  |
| 85+ years | 2023 | 1065 | 17.19 | 16.16 | 18.22 | 0.53 |  |  |  |  |  |  |  |
| Abbreviations: CMR, crude mortality rate; CVD, cardiovascular disease; CI, confidence interval; SE, standard error. | | | | | | | | | |  |  |  |  |
| Note: CMRs are expressed per 100,000 population and represent age-specific crude mortality rates, not age-adjusted to the 2000 U.S. standard population. | | | | | | | | | |  |  |  |  |

| **Supplemental Table 4**. Annual Race- and Ethnicity-Specific Age-Adjusted Cardiovascular Disease–Related Mortality Rates Among Adults With Amyloidosis in the United States, 1999–2023 | | | | | | | | | |
| --- | --- | --- | --- | --- | --- | --- | --- | --- | --- |
| **Race/Ethnicity** | **Year** | **Deaths (n)** | **AAMR** | **95% CI Lower** | **95% CI Upper** | **SE** |  |  |  |
| Hispanic/Latino | 1999 | 33 | 0.65 | 0.44 | 0.93 | 0.12 |  |  |  |
| Hispanic/Latino | 2000 | 27 | 0.52 | 0.33 | 0.78 | 0.11 |  |  |  |
| Hispanic/Latino | 2001 | 32 | 0.59 | 0.39 | 0.85 | 0.11 |  |  |  |
| Hispanic/Latino | 2002 | 40 | 0.71 | 0.51 | 0.98 | 0.12 |  |  |  |
| Hispanic/Latino | 2003 | 40 | 0.59 | 0.41 | 0.81 | 0.10 |  |  |  |
| Hispanic/Latino | 2004 | 35 | 0.55 | 0.38 | 0.78 | 0.10 |  |  |  |
| Hispanic/Latino | 2005 | 27 | 0.42 | 0.27 | 0.62 | 0.08 |  |  |  |
| Hispanic/Latino | 2006 | 44 | 0.63 | 0.45 | 0.85 | 0.10 |  |  |  |
| Hispanic/Latino | 2007 | 37 | 0.44 | 0.30 | 0.63 | 0.08 |  |  |  |
| Hispanic/Latino | 2008 | 58 | 0.74 | 0.56 | 0.97 | 0.10 |  |  |  |
| Hispanic/Latino | 2009 | 50 | 0.61 | 0.45 | 0.82 | 0.09 |  |  |  |
| Hispanic/Latino | 2010 | 57 | 0.66 | 0.50 | 0.87 | 0.09 |  |  |  |
| Hispanic/Latino | 2011 | 49 | 0.54 | 0.39 | 0.72 | 0.08 |  |  |  |
| Hispanic/Latino | 2012 | 49 | 0.50 | 0.36 | 0.66 | 0.07 |  |  |  |
| Hispanic/Latino | 2013 | 80 | 0.77 | 0.60 | 0.96 | 0.09 |  |  |  |
| Hispanic/Latino | 2014 | 79 | 0.78 | 0.61 | 0.98 | 0.09 |  |  |  |
| Hispanic/Latino | 2015 | 72 | 0.66 | 0.51 | 0.83 | 0.08 |  |  |  |
| Hispanic/Latino | 2016 | 79 | 0.69 | 0.54 | 0.86 | 0.08 |  |  |  |
| Hispanic/Latino | 2017 | 86 | 0.70 | 0.55 | 0.86 | 0.08 |  |  |  |
| Hispanic/Latino | 2018 | 106 | 0.84 | 0.67 | 1.01 | 0.09 |  |  |  |
| Hispanic/Latino | 2019 | 111 | 0.85 | 0.69 | 1.02 | 0.08 |  |  |  |
| Hispanic/Latino | 2020 | 150 | 1.15 | 0.96 | 1.33 | 0.10 |  |  |  |
| Hispanic/Latino | 2021 | 161 | 1.23 | 1.03 | 1.42 | 0.10 |  |  |  |
| Hispanic/Latino | 2022 | 191 | 1.35 | 1.15 | 1.55 | 0.10 |  |  |  |
| Hispanic/Latino | 2023 | 171 | 1.21 | 1.03 | 1.40 | 0.09 |  |  |  |
| NH Black | 1999 | 105 | 1.34 | 1.08 | 1.60 | 0.13 |  |  |  |
| NH Black | 2000 | 130 | 1.58 | 1.31 | 1.86 | 0.14 |  |  |  |
| NH Black | 2001 | 122 | 1.45 | 1.19 | 1.72 | 0.13 |  |  |  |
| NH Black | 2002 | 157 | 1.83 | 1.54 | 2.12 | 0.15 |  |  |  |
| NH Black | 2003 | 140 | 1.63 | 1.35 | 1.90 | 0.14 |  |  |  |
| NH Black | 2004 | 117 | 1.27 | 1.03 | 1.50 | 0.12 |  |  |  |
| NH Black | 2005 | 139 | 1.47 | 1.22 | 1.72 | 0.13 |  |  |  |
| NH Black | 2006 | 127 | 1.34 | 1.10 | 1.58 | 0.12 |  |  |  |
| NH Black | 2007 | 159 | 1.66 | 1.39 | 1.92 | 0.13 |  |  |  |
| NH Black | 2008 | 163 | 1.66 | 1.40 | 1.93 | 0.13 |  |  |  |
| NH Black | 2009 | 173 | 1.69 | 1.43 | 1.95 | 0.13 |  |  |  |
| NH Black | 2010 | 169 | 1.68 | 1.42 | 1.94 | 0.13 |  |  |  |
| NH Black | 2011 | 183 | 1.76 | 1.50 | 2.02 | 0.13 |  |  |  |
| NH Black | 2012 | 200 | 1.76 | 1.50 | 2.01 | 0.13 |  |  |  |
| NH Black | 2013 | 223 | 1.97 | 1.71 | 2.24 | 0.14 |  |  |  |
| NH Black | 2014 | 253 | 2.16 | 1.89 | 2.43 | 0.14 |  |  |  |
| NH Black | 2015 | 271 | 2.28 | 2.00 | 2.56 | 0.14 |  |  |  |
| NH Black | 2016 | 290 | 2.37 | 2.09 | 2.65 | 0.14 |  |  |  |
| NH Black | 2017 | 332 | 2.65 | 2.36 | 2.94 | 0.15 |  |  |  |
| NH Black | 2018 | 343 | 2.67 | 2.38 | 2.96 | 0.15 |  |  |  |
| NH Black | 2019 | 445 | 3.37 | 3.05 | 3.69 | 0.16 |  |  |  |
| NH Black | 2020 | 518 | 3.87 | 3.53 | 4.21 | 0.17 |  |  |  |
| NH Black | 2021 | 562 | 4.30 | 3.94 | 4.67 | 0.19 |  |  |  |
| NH Black | 2022 | 597 | 4.43 | 4.07 | 4.79 | 0.19 |  |  |  |
| NH Black | 2023 | 652 | 4.69 | 4.32 | 5.06 | 0.19 |  |  |  |
| NH Other (AI/AN, Asian/PI) | 1999 | 19 | 0.83 | 0.46 | 1.27 | 0.19 |  |  |  |
| NH Other (AI/AN, Asian/PI) | 2000 | 17 | 0.58 | 0.30 | 0.90 | 0.14 |  |  |  |
| NH Other (AI/AN, Asian/PI) | 2001 | 10 | 0.38 | 0.16 | 0.66 | 0.11 |  |  |  |
| NH Other (AI/AN, Asian/PI) | 2002 | 17 | 0.60 | 0.32 | 0.91 | 0.14 |  |  |  |
| NH Other (AI/AN, Asian/PI) | 2003 | 15 | 0.43 | 0.22 | 0.67 | 0.11 |  |  |  |
| NH Other (AI/AN, Asian/PI) | 2004 | 19 | 0.56 | 0.31 | 0.83 | 0.12 |  |  |  |
| NH Other (AI/AN, Asian/PI) | 2005 | 22 | 0.53 | 0.32 | 0.82 | 0.12 |  |  |  |
| NH Other (AI/AN, Asian/PI) | 2006 | 24 | 0.60 | 0.37 | 0.91 | 0.13 |  |  |  |
| NH Other (AI/AN, Asian/PI) | 2007 | 23 | 0.54 | 0.34 | 0.83 | 0.12 |  |  |  |
| NH Other (AI/AN, Asian/PI) | 2008 | 21 | 0.47 | 0.28 | 0.73 | 0.11 |  |  |  |
| NH Other (AI/AN, Asian/PI) | 2009 | 37 | 0.75 | 0.52 | 1.04 | 0.13 |  |  |  |
| NH Other (AI/AN, Asian/PI) | 2010 | 26 | 0.59 | 0.38 | 0.87 | 0.12 |  |  |  |
| NH Other (AI/AN, Asian/PI) | 2011 | 27 | 0.54 | 0.35 | 0.79 | 0.11 |  |  |  |
| NH Other (AI/AN, Asian/PI) | 2012 | 30 | 0.54 | 0.35 | 0.78 | 0.10 |  |  |  |
| NH Other (AI/AN, Asian/PI) | 2013 | 32 | 0.57 | 0.38 | 0.81 | 0.10 |  |  |  |
| NH Other (AI/AN, Asian/PI) | 2014 | 32 | 0.54 | 0.37 | 0.77 | 0.10 |  |  |  |
| NH Other (AI/AN, Asian/PI) | 2015 | 58 | 0.89 | 0.67 | 1.16 | 0.12 |  |  |  |
| NH Other (AI/AN, Asian/PI) | 2016 | 48 | 0.73 | 0.54 | 0.97 | 0.11 |  |  |  |
| NH Other (AI/AN, Asian/PI) | 2017 | 57 | 0.78 | 0.59 | 1.02 | 0.11 |  |  |  |
| NH Other (AI/AN, Asian/PI) | 2018 | 66 | 0.90 | 0.69 | 1.15 | 0.11 |  |  |  |
| NH Other (AI/AN, Asian/PI) | 2019 | 59 | 0.76 | 0.57 | 0.98 | 0.10 |  |  |  |
| NH Other (AI/AN, Asian/PI) | 2020 | 78 | 0.94 | 0.74 | 1.18 | 0.11 |  |  |  |
| NH Other (AI/AN, Asian/PI) | 2021 | 89 | 1.11 | 0.89 | 1.37 | 0.12 |  |  |  |
| NH Other (AI/AN, Asian/PI) | 2022 | 79 | 0.94 | 0.74 | 1.18 | 0.11 |  |  |  |
| NH Other (AI/AN, Asian/PI) | 2023 | 93 | 1.04 | 0.84 | 1.28 | 0.11 |  |  |  |
| NH White | 1999 | 600 | 0.74 | 0.68 | 0.80 | 0.03 |  |  |  |
| NH White | 2000 | 662 | 0.82 | 0.76 | 0.89 | 0.03 |  |  |  |
| NH White | 2001 | 650 | 0.81 | 0.75 | 0.87 | 0.03 |  |  |  |
| NH White | 2002 | 662 | 0.83 | 0.77 | 0.90 | 0.03 |  |  |  |
| NH White | 2003 | 657 | 0.76 | 0.70 | 0.82 | 0.03 |  |  |  |
| NH White | 2004 | 619 | 0.73 | 0.67 | 0.79 | 0.03 |  |  |  |
| NH White | 2005 | 660 | 0.74 | 0.69 | 0.80 | 0.03 |  |  |  |
| NH White | 2006 | 669 | 0.78 | 0.72 | 0.84 | 0.03 |  |  |  |
| NH White | 2007 | 670 | 0.77 | 0.71 | 0.82 | 0.03 |  |  |  |
| NH White | 2008 | 741 | 0.80 | 0.74 | 0.86 | 0.03 |  |  |  |
| NH White | 2009 | 722 | 0.78 | 0.73 | 0.84 | 0.03 |  |  |  |
| NH White | 2010 | 748 | 0.82 | 0.76 | 0.88 | 0.03 |  |  |  |
| NH White | 2011 | 780 | 0.81 | 0.76 | 0.87 | 0.03 |  |  |  |
| NH White | 2012 | 798 | 0.83 | 0.77 | 0.89 | 0.03 |  |  |  |
| NH White | 2013 | 812 | 0.85 | 0.79 | 0.91 | 0.03 |  |  |  |
| NH White | 2014 | 916 | 0.92 | 0.86 | 0.98 | 0.03 |  |  |  |
| NH White | 2015 | 1009 | 1.03 | 0.96 | 1.09 | 0.03 |  |  |  |
| NH White | 2016 | 1096 | 1.06 | 1.00 | 1.13 | 0.03 |  |  |  |
| NH White | 2017 | 1146 | 1.10 | 1.04 | 1.16 | 0.03 |  |  |  |
| NH White | 2018 | 1319 | 1.26 | 1.19 | 1.32 | 0.03 |  |  |  |
| NH White | 2019 | 1451 | 1.34 | 1.27 | 1.41 | 0.04 |  |  |  |
| NH White | 2020 | 1725 | 1.55 | 1.47 | 1.62 | 0.04 |  |  |  |
| NH White | 2021 | 1957 | 1.88 | 1.80 | 1.97 | 0.04 |  |  |  |
| NH White | 2022 | 2177 | 1.94 | 1.86 | 2.02 | 0.04 |  |  |  |
| NH White | 2023 | 2427 | 2.16 | 2.08 | 2.25 | 0.04 |  |  |  |
| Abbreviations: AAMR, age-adjusted mortality rate; CVD, cardiovascular disease; CI, confidence interval; | | | | | | | | |  |
| SE, standard error; NH, non-Hispanic; AI/AN, American Indian/Alaska Native; PI, Pacific Islander. | | | | | | |  |  |  |
| Note: AAMRs are expressed per 100,000 population and age-adjusted to the 2000 U.S. standard population. | | | | | | |  |  |  |
| Race and ethnicity were classified according to U.S. Office of Management and Budget standards. | | | | | | |  |  |  |
| The NH Other category includes American Indian/Alaska Native and Asian/Pacific Islander populations. | | | | | | |  |  |  |

| **Supplemental Table 5**. Annual U.S. Census Region–Specific Age-Adjusted Cardiovascular Disease–Related Mortality Rates Among Adults With Amyloidosis in the United States, 1999–2023 | | | | | | | |
| --- | --- | --- | --- | --- | --- | --- | --- |
| **Census Region** | **Year** | **Deaths (n)** | **AAMR** | **95% CI Lower** | **95% CI Upper** | **SE** |  |
| Northeast | 1999 | 181 | 0.93 | 0.79 | 1.06 | 0.07 |  |
| Northeast | 2000 | 188 | 0.94 | 0.80 | 1.07 | 0.07 |  |
| Northeast | 2001 | 166 | 0.84 | 0.71 | 0.96 | 0.07 |  |
| Northeast | 2002 | 176 | 0.84 | 0.72 | 0.96 | 0.06 |  |
| Northeast | 2003 | 198 | 0.93 | 0.80 | 1.05 | 0.07 |  |
| Northeast | 2004 | 199 | 0.97 | 0.83 | 1.10 | 0.07 |  |
| Northeast | 2005 | 182 | 0.88 | 0.75 | 1.00 | 0.07 |  |
| Northeast | 2006 | 181 | 0.88 | 0.75 | 1.01 | 0.07 |  |
| Northeast | 2007 | 215 | 0.98 | 0.85 | 1.11 | 0.07 |  |
| Northeast | 2008 | 254 | 1.17 | 1.03 | 1.32 | 0.07 |  |
| Northeast | 2009 | 247 | 1.12 | 0.98 | 1.27 | 0.07 |  |
| Northeast | 2010 | 213 | 0.93 | 0.80 | 1.06 | 0.06 |  |
| Northeast | 2011 | 243 | 1.10 | 0.96 | 1.24 | 0.07 |  |
| Northeast | 2012 | 264 | 1.13 | 1.00 | 1.27 | 0.07 |  |
| Northeast | 2013 | 263 | 1.13 | 0.99 | 1.27 | 0.07 |  |
| Northeast | 2014 | 320 | 1.31 | 1.16 | 1.45 | 0.07 |  |
| Northeast | 2015 | 367 | 1.52 | 1.36 | 1.68 | 0.08 |  |
| Northeast | 2016 | 370 | 1.50 | 1.35 | 1.66 | 0.08 |  |
| Northeast | 2017 | 395 | 1.57 | 1.42 | 1.73 | 0.08 |  |
| Northeast | 2018 | 445 | 1.70 | 1.54 | 1.86 | 0.08 |  |
| Northeast | 2019 | 519 | 1.98 | 1.81 | 2.16 | 0.09 |  |
| Northeast | 2020 | 578 | 2.16 | 1.98 | 2.34 | 0.09 |  |
| Northeast | 2021 | 660 | 2.50 | 2.31 | 2.69 | 0.10 |  |
| Northeast | 2022 | 724 | 2.62 | 2.43 | 2.81 | 0.10 |  |
| Northeast | 2023 | 772 | 2.77 | 2.57 | 2.97 | 0.10 |  |
| Midwest | 1999 | 190 | 0.84 | 0.72 | 0.96 | 0.06 |  |
| Midwest | 2000 | 223 | 0.98 | 0.85 | 1.10 | 0.07 |  |
| Midwest | 2001 | 223 | 0.96 | 0.83 | 1.08 | 0.06 |  |
| Midwest | 2002 | 222 | 0.96 | 0.84 | 1.09 | 0.06 |  |
| Midwest | 2003 | 193 | 0.82 | 0.70 | 0.93 | 0.06 |  |
| Midwest | 2004 | 206 | 0.85 | 0.74 | 0.97 | 0.06 |  |
| Midwest | 2005 | 195 | 0.81 | 0.69 | 0.92 | 0.06 |  |
| Midwest | 2006 | 213 | 0.89 | 0.77 | 1.01 | 0.06 |  |
| Midwest | 2007 | 210 | 0.86 | 0.75 | 0.98 | 0.06 |  |
| Midwest | 2008 | 221 | 0.86 | 0.75 | 0.98 | 0.06 |  |
| Midwest | 2009 | 217 | 0.88 | 0.76 | 1.00 | 0.06 |  |
| Midwest | 2010 | 238 | 0.94 | 0.82 | 1.05 | 0.06 |  |
| Midwest | 2011 | 241 | 0.91 | 0.79 | 1.03 | 0.06 |  |
| Midwest | 2012 | 254 | 0.92 | 0.81 | 1.04 | 0.06 |  |
| Midwest | 2013 | 279 | 1.05 | 0.92 | 1.17 | 0.06 |  |
| Midwest | 2014 | 323 | 1.18 | 1.05 | 1.31 | 0.07 |  |
| Midwest | 2015 | 338 | 1.19 | 1.07 | 1.32 | 0.07 |  |
| Midwest | 2016 | 381 | 1.37 | 1.23 | 1.50 | 0.07 |  |
| Midwest | 2017 | 363 | 1.26 | 1.13 | 1.39 | 0.07 |  |
| Midwest | 2018 | 436 | 1.43 | 1.30 | 1.57 | 0.07 |  |
| Midwest | 2019 | 458 | 1.53 | 1.39 | 1.67 | 0.07 |  |
| Midwest | 2020 | 608 | 1.97 | 1.81 | 2.13 | 0.08 |  |
| Midwest | 2021 | 607 | 2.07 | 1.91 | 2.24 | 0.08 |  |
| Midwest | 2022 | 699 | 2.25 | 2.08 | 2.41 | 0.09 |  |
| Midwest | 2023 | 767 | 2.42 | 2.24 | 2.59 | 0.09 |  |
| South | 1999 | 212 | 0.63 | 0.54 | 0.71 | 0.04 |  |
| South | 2000 | 261 | 0.76 | 0.67 | 0.85 | 0.05 |  |
| South | 2001 | 252 | 0.71 | 0.63 | 0.80 | 0.05 |  |
| South | 2002 | 275 | 0.77 | 0.68 | 0.86 | 0.05 |  |
| South | 2003 | 258 | 0.72 | 0.64 | 0.81 | 0.05 |  |
| South | 2004 | 220 | 0.58 | 0.50 | 0.66 | 0.04 |  |
| South | 2005 | 253 | 0.68 | 0.59 | 0.76 | 0.04 |  |
| South | 2006 | 249 | 0.68 | 0.59 | 0.76 | 0.04 |  |
| South | 2007 | 274 | 0.69 | 0.60 | 0.77 | 0.04 |  |
| South | 2008 | 279 | 0.68 | 0.60 | 0.76 | 0.04 |  |
| South | 2009 | 269 | 0.63 | 0.55 | 0.71 | 0.04 |  |
| South | 2010 | 307 | 0.71 | 0.63 | 0.79 | 0.04 |  |
| South | 2011 | 312 | 0.71 | 0.63 | 0.79 | 0.04 |  |
| South | 2012 | 299 | 0.66 | 0.59 | 0.74 | 0.04 |  |
| South | 2013 | 327 | 0.69 | 0.62 | 0.77 | 0.04 |  |
| South | 2014 | 355 | 0.73 | 0.65 | 0.80 | 0.04 |  |
| South | 2015 | 369 | 0.75 | 0.67 | 0.83 | 0.04 |  |
| South | 2016 | 413 | 0.84 | 0.76 | 0.93 | 0.04 |  |
| South | 2017 | 445 | 0.90 | 0.81 | 0.98 | 0.04 |  |
| South | 2018 | 508 | 0.98 | 0.90 | 1.07 | 0.04 |  |
| South | 2019 | 592 | 1.11 | 1.02 | 1.20 | 0.05 |  |
| South | 2020 | 712 | 1.32 | 1.23 | 1.42 | 0.05 |  |
| South | 2021 | 819 | 1.51 | 1.41 | 1.62 | 0.05 |  |
| South | 2022 | 875 | 1.54 | 1.44 | 1.65 | 0.05 |  |
| South | 2023 | 1002 | 1.77 | 1.66 | 1.88 | 0.06 |  |
| West | 1999 | 177 | 0.94 | 0.80 | 1.08 | 0.07 |  |
| West | 2000 | 166 | 0.85 | 0.72 | 0.98 | 0.07 |  |
| West | 2001 | 173 | 0.89 | 0.76 | 1.02 | 0.07 |  |
| West | 2002 | 206 | 1.00 | 0.86 | 1.13 | 0.07 |  |
| West | 2003 | 206 | 0.97 | 0.84 | 1.10 | 0.07 |  |
| West | 2004 | 167 | 0.78 | 0.66 | 0.90 | 0.06 |  |
| West | 2005 | 218 | 1.01 | 0.88 | 1.15 | 0.07 |  |
| West | 2006 | 221 | 0.98 | 0.85 | 1.11 | 0.07 |  |
| West | 2007 | 190 | 0.82 | 0.70 | 0.93 | 0.06 |  |
| West | 2008 | 230 | 0.99 | 0.86 | 1.12 | 0.07 |  |
| West | 2009 | 250 | 1.01 | 0.88 | 1.13 | 0.06 |  |
| West | 2010 | 243 | 1.01 | 0.89 | 1.14 | 0.07 |  |
| West | 2011 | 244 | 0.97 | 0.84 | 1.09 | 0.06 |  |
| West | 2012 | 263 | 1.02 | 0.89 | 1.14 | 0.06 |  |
| West | 2013 | 280 | 1.05 | 0.93 | 1.17 | 0.06 |  |
| West | 2014 | 287 | 1.04 | 0.92 | 1.16 | 0.06 |  |
| West | 2015 | 339 | 1.18 | 1.05 | 1.30 | 0.06 |  |
| West | 2016 | 355 | 1.20 | 1.08 | 1.33 | 0.06 |  |
| West | 2017 | 420 | 1.41 | 1.27 | 1.55 | 0.07 |  |
| West | 2018 | 451 | 1.47 | 1.33 | 1.61 | 0.07 |  |
| West | 2019 | 503 | 1.59 | 1.45 | 1.73 | 0.07 |  |
| West | 2020 | 576 | 1.82 | 1.67 | 1.97 | 0.08 |  |
| West | 2021 | 704 | 2.25 | 2.08 | 2.42 | 0.09 |  |
| West | 2022 | 764 | 2.29 | 2.13 | 2.46 | 0.08 |  |
| West | 2023 | 827 | 2.48 | 2.31 | 2.65 | 0.09 |  |
| Abbreviations: AAMR, age-adjusted mortality rate; CVD, cardiovascular disease; CI, confidence interval; SE, standard error. | | | | | | | |
| Note: AAMRs are expressed per 100,000 population and age-adjusted to the 2000 U.S. standard population. Regional classifications follow U.S. Census Bureau definitions. | | | | | | | |

| **Supplemental Table 6**. Annual Age-Adjusted Cardiovascular Disease–Related Mortality Rates by Urbanization Level Among Adults With Amyloidosis in the United States, 1999–2023 | | | | | | | | |
| --- | --- | --- | --- | --- | --- | --- | --- | --- |
| **Variable** | **Year** | **Deaths (n)** | **AAMR** | **95% CI Lower** | **95% CI Upper** | **SE** |  |  |
| Medium/small metropolitan | 1999 | 225 | 0.78 | 0.67 | 0.88 | 0.05 |  |  |
| Medium/small metropolitan | 2000 | 219 | 0.73 | 0.63 | 0.82 | 0.05 |  |  |
| Medium/small metropolitan | 2001 | 244 | 0.83 | 0.73 | 0.94 | 0.05 |  |  |
| Medium/small metropolitan | 2002 | 249 | 0.81 | 0.71 | 0.91 | 0.05 |  |  |
| Medium/small metropolitan | 2003 | 245 | 0.77 | 0.68 | 0.87 | 0.05 |  |  |
| Medium/small metropolitan | 2004 | 238 | 0.77 | 0.67 | 0.87 | 0.05 |  |  |
| Medium/small metropolitan | 2005 | 248 | 0.74 | 0.64 | 0.83 | 0.05 |  |  |
| Medium/small metropolitan | 2006 | 241 | 0.71 | 0.62 | 0.80 | 0.05 |  |  |
| Medium/small metropolitan | 2007 | 259 | 0.76 | 0.67 | 0.85 | 0.05 |  |  |
| Medium/small metropolitan | 2008 | 285 | 0.83 | 0.73 | 0.93 | 0.05 |  |  |
| Medium/small metropolitan | 2009 | 282 | 0.80 | 0.70 | 0.89 | 0.05 |  |  |
| Medium/small metropolitan | 2010 | 303 | 0.82 | 0.73 | 0.91 | 0.05 |  |  |
| Medium/small metropolitan | 2011 | 303 | 0.80 | 0.71 | 0.89 | 0.05 |  |  |
| Medium/small metropolitan | 2012 | 295 | 0.78 | 0.69 | 0.88 | 0.05 |  |  |
| Medium/small metropolitan | 2013 | 322 | 0.81 | 0.72 | 0.90 | 0.05 |  |  |
| Medium/small metropolitan | 2014 | 349 | 0.87 | 0.78 | 0.97 | 0.05 |  |  |
| Medium/small metropolitan | 2015 | 412 | 0.98 | 0.89 | 1.08 | 0.05 |  |  |
| Medium/small metropolitan | 2016 | 471 | 1.12 | 1.02 | 1.22 | 0.05 |  |  |
| Medium/small metropolitan | 2017 | 477 | 1.13 | 1.03 | 1.23 | 0.05 |  |  |
| Medium/small metropolitan | 2018 | 550 | 1.27 | 1.16 | 1.38 | 0.05 |  |  |
| Medium/small metropolitan | 2019 | 633 | 1.43 | 1.31 | 1.54 | 0.06 |  |  |
| Medium/small metropolitan | 2020 | 727 | 1.59 | 1.47 | 1.71 | 0.06 |  |  |
| Large metropolitan | 1999 | 413 | 0.85 | 0.77 | 0.93 | 0.04 |  |  |
| Large metropolitan | 2000 | 477 | 0.96 | 0.88 | 1.05 | 0.04 |  |  |
| Large metropolitan | 2001 | 429 | 0.87 | 0.79 | 0.96 | 0.04 |  |  |
| Large metropolitan | 2002 | 492 | 0.98 | 0.89 | 1.07 | 0.04 |  |  |
| Large metropolitan | 2003 | 459 | 0.91 | 0.83 | 0.99 | 0.04 |  |  |
| Large metropolitan | 2004 | 418 | 0.77 | 0.70 | 0.85 | 0.04 |  |  |
| Large metropolitan | 2005 | 452 | 0.84 | 0.76 | 0.92 | 0.04 |  |  |
| Large metropolitan | 2006 | 485 | 0.89 | 0.81 | 0.97 | 0.04 |  |  |
| Large metropolitan | 2007 | 492 | 0.87 | 0.79 | 0.95 | 0.04 |  |  |
| Large metropolitan | 2008 | 534 | 0.93 | 0.85 | 1.01 | 0.04 |  |  |
| Large metropolitan | 2009 | 546 | 0.96 | 0.87 | 1.04 | 0.04 |  |  |
| Large metropolitan | 2010 | 558 | 0.99 | 0.91 | 1.07 | 0.04 |  |  |
| Large metropolitan | 2011 | 574 | 0.99 | 0.90 | 1.07 | 0.04 |  |  |
| Large metropolitan | 2012 | 646 | 1.06 | 0.97 | 1.14 | 0.04 |  |  |
| Large metropolitan | 2013 | 649 | 1.05 | 0.97 | 1.14 | 0.04 |  |  |
| Large metropolitan | 2014 | 748 | 1.15 | 1.07 | 1.23 | 0.04 |  |  |
| Large metropolitan | 2015 | 784 | 1.22 | 1.13 | 1.31 | 0.04 |  |  |
| Large metropolitan | 2016 | 839 | 1.27 | 1.18 | 1.36 | 0.04 |  |  |
| Large metropolitan | 2017 | 945 | 1.38 | 1.29 | 1.47 | 0.05 |  |  |
| Large metropolitan | 2018 | 1020 | 1.43 | 1.34 | 1.51 | 0.05 |  |  |
| Large metropolitan | 2019 | 1161 | 1.57 | 1.48 | 1.67 | 0.05 |  |  |
| Large metropolitan | 2020 | 1410 | 1.90 | 1.80 | 2.00 | 0.05 |  |  |
| Rural | 1999 | 122 | 0.69 | 0.57 | 0.81 | 0.06 |  |  |
| Rural | 2000 | 142 | 0.80 | 0.67 | 0.93 | 0.07 |  |  |
| Rural | 2001 | 141 | 0.77 | 0.64 | 0.89 | 0.06 |  |  |
| Rural | 2002 | 138 | 0.73 | 0.61 | 0.85 | 0.06 |  |  |
| Rural | 2003 | 151 | 0.83 | 0.70 | 0.97 | 0.07 |  |  |
| Rural | 2004 | 136 | 0.72 | 0.60 | 0.85 | 0.06 |  |  |
| Rural | 2005 | 148 | 0.80 | 0.67 | 0.93 | 0.07 |  |  |
| Rural | 2006 | 138 | 0.71 | 0.59 | 0.83 | 0.06 |  |  |
| Rural | 2007 | 138 | 0.70 | 0.59 | 0.82 | 0.06 |  |  |
| Rural | 2008 | 165 | 0.83 | 0.70 | 0.96 | 0.06 |  |  |
| Rural | 2009 | 155 | 0.77 | 0.65 | 0.90 | 0.06 |  |  |
| Rural | 2010 | 140 | 0.69 | 0.57 | 0.80 | 0.06 |  |  |
| Rural | 2011 | 163 | 0.80 | 0.68 | 0.93 | 0.06 |  |  |
| Rural | 2012 | 139 | 0.67 | 0.55 | 0.78 | 0.06 |  |  |
| Rural | 2013 | 178 | 0.82 | 0.70 | 0.94 | 0.06 |  |  |
| Rural | 2014 | 188 | 0.85 | 0.73 | 0.98 | 0.06 |  |  |
| Rural | 2015 | 217 | 0.99 | 0.86 | 1.13 | 0.07 |  |  |
| Rural | 2016 | 209 | 0.95 | 0.82 | 1.08 | 0.07 |  |  |
| Rural | 2017 | 201 | 0.88 | 0.76 | 1.00 | 0.06 |  |  |
| Rural | 2018 | 270 | 1.16 | 1.02 | 1.29 | 0.07 |  |  |
| Rural | 2019 | 278 | 1.17 | 1.03 | 1.31 | 0.07 |  |  |
| Rural | 2020 | 337 | 1.39 | 1.24 | 1.54 | 0.08 |  |  |
| Abbreviations: AAMR, age-adjusted mortality rate; CVD, cardiovascular disease; CI, confidence interval; SE, standard error. | | | | | | | |  |
| Note: AAMRs are expressed per 100,000 population and age-adjusted to the 2000 U.S. standard population. | | | | | | |  |  |

| **Supplemental Table 7**. Annual Age-Adjusted Mortality Rates for Major Cardiovascular Causes Among Adults With Amyloidosis, United States, 1999–2023 | | | | | | | |
| --- | --- | --- | --- | --- | --- | --- | --- |
| **CVD Cause** | **Year** | **Deaths (n)** | **AAMR** | **95% CI Lower** | **95% CI Upper** | **SE** |  |
| Heart failure | 1999 | 252 | 0.25 | 0.22 | 0.28 | 0.02 |  |
| Heart failure | 2000 | 259 | 0.27 | 0.24 | 0.31 | 0.02 |  |
| Heart failure | 2001 | 261 | 0.23 | 0.21 | 0.26 | 0.02 |  |
| Heart failure | 2002 | 267 | 0.27 | 0.23 | 0.30 | 0.02 |  |
| Heart failure | 2003 | 264 | 0.26 | 0.23 | 0.30 | 0.02 |  |
| Heart failure | 2004 | 292 | 0.26 | 0.23 | 0.30 | 0.02 |  |
| Heart failure | 2005 | 279 | 0.26 | 0.23 | 0.29 | 0.02 |  |
| Heart failure | 2006 | 277 | 0.26 | 0.23 | 0.29 | 0.02 |  |
| Heart failure | 2007 | 300 | 0.28 | 0.24 | 0.31 | 0.02 |  |
| Heart failure | 2008 | 353 | 0.30 | 0.27 | 0.34 | 0.02 |  |
| Heart failure | 2009 | 330 | 0.31 | 0.27 | 0.34 | 0.02 |  |
| Heart failure | 2010 | 340 | 0.30 | 0.26 | 0.33 | 0.02 |  |
| Heart failure | 2011 | 349 | 0.33 | 0.29 | 0.36 | 0.02 |  |
| Heart failure | 2012 | 339 | 0.26 | 0.23 | 0.29 | 0.01 |  |
| Heart failure | 2013 | 372 | 0.30 | 0.27 | 0.34 | 0.02 |  |
| Heart failure | 2014 | 434 | 0.32 | 0.29 | 0.35 | 0.02 |  |
| Heart failure | 2015 | 478 | 0.41 | 0.37 | 0.45 | 0.02 |  |
| Heart failure | 2016 | 575 | 0.47 | 0.43 | 0.51 | 0.02 |  |
| Heart failure | 2017 | 624 | 0.44 | 0.41 | 0.48 | 0.02 |  |
| Heart failure | 2018 | 749 | 0.52 | 0.48 | 0.55 | 0.02 |  |
| Heart failure | 2019 | 833 | 0.62 | 0.58 | 0.66 | 0.02 |  |
| Heart failure | 2020 | 1059 | 0.74 | 0.70 | 0.79 | 0.02 |  |
| Heart failure | 2021 | 1307 | 0.96 | 0.90 | 1.01 | 0.03 |  |
| Heart failure | 2022 | 1341 | 0.92 | 0.87 | 0.97 | 0.03 |  |
| Heart failure | 2023 | 1536 | 1.05 | 1.00 | 1.10 | 0.03 |  |
| Atrial fibrillation/flutter | 1999 | 31 | 0.02 | 0.01 | 0.03 | 0.00 |  |
| Atrial fibrillation/flutter | 2000 | 38 | 0.04 | 0.03 | 0.06 | 0.01 |  |
| Atrial fibrillation/flutter | 2001 | 38 | 0.02 | 0.01 | 0.03 | 0.00 |  |
| Atrial fibrillation/flutter | 2002 | 31 | 0.02 | 0.01 | 0.03 | 0.00 |  |
| Atrial fibrillation/flutter | 2003 | 42 | 0.04 | 0.03 | 0.06 | 0.01 |  |
| Atrial fibrillation/flutter | 2004 | 45 | 0.04 | 0.03 | 0.06 | 0.01 |  |
| Atrial fibrillation/flutter | 2005 | 48 | 0.04 | 0.03 | 0.05 | 0.01 |  |
| Atrial fibrillation/flutter | 2006 | 45 | 0.05 | 0.03 | 0.07 | 0.01 |  |
| Atrial fibrillation/flutter | 2007 | 53 | 0.06 | 0.04 | 0.08 | 0.01 |  |
| Atrial fibrillation/flutter | 2008 | 51 | 0.04 | 0.03 | 0.06 | 0.01 |  |
| Atrial fibrillation/flutter | 2009 | 69 | 0.06 | 0.04 | 0.07 | 0.01 |  |
| Atrial fibrillation/flutter | 2010 | 81 | 0.08 | 0.07 | 0.10 | 0.01 |  |
| Atrial fibrillation/flutter | 2011 | 96 | 0.08 | 0.06 | 0.10 | 0.01 |  |
| Atrial fibrillation/flutter | 2012 | 90 | 0.08 | 0.06 | 0.09 | 0.01 |  |
| Atrial fibrillation/flutter | 2013 | 111 | 0.08 | 0.07 | 0.10 | 0.01 |  |
| Atrial fibrillation/flutter | 2014 | 133 | 0.10 | 0.08 | 0.11 | 0.01 |  |
| Atrial fibrillation/flutter | 2015 | 140 | 0.09 | 0.08 | 0.11 | 0.01 |  |
| Atrial fibrillation/flutter | 2016 | 153 | 0.11 | 0.09 | 0.13 | 0.01 |  |
| Atrial fibrillation/flutter | 2017 | 195 | 0.14 | 0.12 | 0.16 | 0.01 |  |
| Atrial fibrillation/flutter | 2018 | 276 | 0.20 | 0.18 | 0.23 | 0.01 |  |
| Atrial fibrillation/flutter | 2019 | 301 | 0.22 | 0.19 | 0.24 | 0.01 |  |
| Atrial fibrillation/flutter | 2020 | 409 | 0.27 | 0.25 | 0.30 | 0.01 |  |
| Atrial fibrillation/flutter | 2021 | 520 | 0.36 | 0.33 | 0.39 | 0.02 |  |
| Atrial fibrillation/flutter | 2022 | 583 | 0.41 | 0.38 | 0.44 | 0.02 |  |
| Atrial fibrillation/flutter | 2023 | 668 | 0.47 | 0.43 | 0.50 | 0.02 |  |
| Ischemic heart disease | 1999 | 120 | 0.12 | 0.10 | 0.14 | 0.01 |  |
| Ischemic heart disease | 2000 | 132 | 0.13 | 0.11 | 0.16 | 0.01 |  |
| Ischemic heart disease | 2001 | 121 | 0.14 | 0.11 | 0.16 | 0.01 |  |
| Ischemic heart disease | 2002 | 148 | 0.16 | 0.13 | 0.18 | 0.01 |  |
| Ischemic heart disease | 2003 | 118 | 0.10 | 0.08 | 0.12 | 0.01 |  |
| Ischemic heart disease | 2004 | 117 | 0.09 | 0.08 | 0.11 | 0.01 |  |
| Ischemic heart disease | 2005 | 141 | 0.14 | 0.11 | 0.16 | 0.01 |  |
| Ischemic heart disease | 2006 | 135 | 0.13 | 0.11 | 0.15 | 0.01 |  |
| Ischemic heart disease | 2007 | 137 | 0.12 | 0.09 | 0.14 | 0.01 |  |
| Ischemic heart disease | 2008 | 149 | 0.15 | 0.12 | 0.17 | 0.01 |  |
| Ischemic heart disease | 2009 | 123 | 0.12 | 0.10 | 0.14 | 0.01 |  |
| Ischemic heart disease | 2010 | 151 | 0.12 | 0.10 | 0.15 | 0.01 |  |
| Ischemic heart disease | 2011 | 147 | 0.12 | 0.10 | 0.14 | 0.01 |  |
| Ischemic heart disease | 2012 | 160 | 0.14 | 0.11 | 0.16 | 0.01 |  |
| Ischemic heart disease | 2013 | 184 | 0.17 | 0.14 | 0.19 | 0.01 |  |
| Ischemic heart disease | 2014 | 165 | 0.12 | 0.10 | 0.14 | 0.01 |  |
| Ischemic heart disease | 2015 | 200 | 0.15 | 0.12 | 0.17 | 0.01 |  |
| Ischemic heart disease | 2016 | 225 | 0.16 | 0.14 | 0.18 | 0.01 |  |
| Ischemic heart disease | 2017 | 253 | 0.17 | 0.15 | 0.19 | 0.01 |  |
| Ischemic heart disease | 2018 | 287 | 0.22 | 0.19 | 0.25 | 0.01 |  |
| Ischemic heart disease | 2019 | 334 | 0.24 | 0.21 | 0.26 | 0.01 |  |
| Ischemic heart disease | 2020 | 402 | 0.29 | 0.26 | 0.32 | 0.01 |  |
| Ischemic heart disease | 2021 | 480 | 0.36 | 0.32 | 0.39 | 0.02 |  |
| Ischemic heart disease | 2022 | 578 | 0.40 | 0.37 | 0.43 | 0.02 |  |
| Ischemic heart disease | 2023 | 615 | 0.42 | 0.39 | 0.46 | 0.02 |  |
| Abbreviations: AAMR, age-adjusted mortality rate; CVD, cardiovascular disease; CI, confidence interval; SE, standard error. | | | | | | | |
| Note: AAMRs are expressed per 100,000 population and age-adjusted to the 2000 U.S. standard population. | | | | | | | |
| Heart failure, atrial fibrillation/flutter, and ischemic heart disease were defined using ICD-10 codes (see Methods). | | | | | | |  |

| **Supplemental Table 8**. State-Level Age-Adjusted Mortality Rates for Cardiovascular Disease–Related Deaths Among Adults With Amyloidosis in the United States, 1999–2023 | | | | | | | |
| --- | --- | --- | --- | --- | --- | --- | --- |
| **State** | **Year** | **Deaths (n)** | **AAMR** | **95% CI Lower** | **95% CI Upper** | **SE** |  |
| Alabama | 1999 | NA | NA | NA | NA | NA |  |
| Alabama | 2000 | NA | NA | NA | NA | NA |  |
| Alabama | 2001 | NA | NA | NA | NA | NA |  |
| Alabama | 2002 | NA | NA | NA | NA | NA |  |
| Alabama | 2003 | NA | NA | NA | NA | NA |  |
| Alabama | 2004 | 10 | 0.68 | 0.30 | 1.13 | 0.20 |  |
| Alabama | 2005 | 12 | 0.77 | 0.37 | 1.25 | 0.21 |  |
| Alabama | 2006 | 14 | 0.83 | 0.42 | 1.30 | 0.21 |  |
| Alabama | 2007 | 11 | 0.67 | 0.30 | 1.09 | 0.19 |  |
| Alabama | 2008 | NA | NA | NA | NA | NA |  |
| Alabama | 2009 | NA | NA | NA | NA | NA |  |
| Alabama | 2010 | 10 | 0.61 | 0.26 | 1.02 | 0.18 |  |
| Alabama | 2011 | 10 | 0.56 | 0.24 | 0.93 | 0.16 |  |
| Alabama | 2012 | 10 | 0.58 | 0.25 | 0.97 | 0.17 |  |
| Alabama | 2013 | NA | NA | NA | NA | NA |  |
| Alabama | 2014 | NA | NA | NA | NA | NA |  |
| Alabama | 2015 | NA | NA | NA | NA | NA |  |
| Alabama | 2016 | 12 | 0.64 | 0.30 | 1.03 | 0.17 |  |
| Alabama | 2017 | 10 | 0.58 | 0.25 | 0.96 | 0.17 |  |
| Alabama | 2018 | 12 | 0.62 | 0.29 | 1.02 | 0.17 |  |
| Alabama | 2019 | 13 | 0.64 | 0.31 | 1.04 | 0.17 |  |
| Alabama | 2020 | NA | NA | NA | NA | NA |  |
| Alabama | 2021 | 16 | 0.70 | 0.37 | 1.07 | 0.17 |  |
| Alabama | 2022 | 17 | 0.75 | 0.41 | 1.13 | 0.17 |  |
| Alabama | 2023 | 20 | 0.80 | 0.49 | 1.23 | 0.18 |  |
| Alaska | 1999 | NA | NA | NA | NA | NA |  |
| Alaska | 2000 | NA | NA | NA | NA | NA |  |
| Alaska | 2001 | NA | NA | NA | NA | NA |  |
| Alaska | 2002 | 0 | 0 | 0 | 0 | 0 |  |
| Alaska | 2003 | 0 | 0 | 0 | 0 | 0 |  |
| Alaska | 2004 | NA | NA | NA | NA | NA |  |
| Alaska | 2005 | NA | NA | NA | NA | NA |  |
| Alaska | 2006 | NA | NA | NA | NA | NA |  |
| Alaska | 2007 | 0 | 0 | 0 | 0 | 0 |  |
| Alaska | 2008 | NA | NA | NA | NA | NA |  |
| Alaska | 2009 | NA | NA | NA | NA | NA |  |
| Alaska | 2010 | NA | NA | NA | NA | NA |  |
| Alaska | 2011 | NA | NA | NA | NA | NA |  |
| Alaska | 2012 | NA | NA | NA | NA | NA |  |
| Alaska | 2013 | NA | NA | NA | NA | NA |  |
| Alaska | 2014 | NA | NA | NA | NA | NA |  |
| Alaska | 2015 | NA | NA | NA | NA | NA |  |
| Alaska | 2016 | NA | NA | NA | NA | NA |  |
| Alaska | 2017 | NA | NA | NA | NA | NA |  |
| Alaska | 2018 | 0 | 0 | 0 | 0 | 0 |  |
| Alaska | 2019 | NA | NA | NA | NA | NA |  |
| Alaska | 2020 | NA | NA | NA | NA | NA |  |
| Alaska | 2021 | NA | NA | NA | NA | NA |  |
| Alaska | 2022 | NA | NA | NA | NA | NA |  |
| Alaska | 2023 | NA | NA | NA | NA | NA |  |
| Arizona | 1999 | 14 | 0.89 | 0.45 | 1.39 | 0.22 |  |
| Arizona | 2000 | 11 | 0.67 | 0.31 | 1.09 | 0.18 |  |
| Arizona | 2001 | 10 | 0.59 | 0.26 | 0.99 | 0.17 |  |
| Arizona | 2002 | 18 | 1.03 | 0.58 | 1.54 | 0.23 |  |
| Arizona | 2003 | 19 | 1.04 | 0.60 | 1.54 | 0.23 |  |
| Arizona | 2004 | 13 | 0.68 | 0.34 | 1.08 | 0.18 |  |
| Arizona | 2005 | 17 | 0.87 | 0.48 | 1.32 | 0.20 |  |
| Arizona | 2006 | 22 | 1.02 | 0.64 | 1.54 | 0.22 |  |
| Arizona | 2007 | 14 | 0.68 | 0.35 | 1.07 | 0.17 |  |
| Arizona | 2008 | 21 | 0.92 | 0.57 | 1.40 | 0.20 |  |
| Arizona | 2009 | 13 | 0.61 | 0.30 | 0.97 | 0.16 |  |
| Arizona | 2010 | 29 | 1.21 | 0.81 | 1.73 | 0.22 |  |
| Arizona | 2011 | 26 | 1.01 | 0.66 | 1.48 | 0.20 |  |
| Arizona | 2012 | 27 | 1.05 | 0.69 | 1.53 | 0.20 |  |
| Arizona | 2013 | 23 | 0.85 | 0.54 | 1.28 | 0.18 |  |
| Arizona | 2014 | 24 | 0.84 | 0.54 | 1.25 | 0.17 |  |
| Arizona | 2015 | 31 | 1.07 | 0.73 | 1.52 | 0.19 |  |
| Arizona | 2016 | 28 | 0.95 | 0.63 | 1.38 | 0.18 |  |
| Arizona | 2017 | 29 | 0.90 | 0.60 | 1.29 | 0.17 |  |
| Arizona | 2018 | 32 | 1.05 | 0.71 | 1.48 | 0.19 |  |
| Arizona | 2019 | 39 | 1.15 | 0.82 | 1.58 | 0.19 |  |
| Arizona | 2020 | 44 | 1.23 | 0.89 | 1.66 | 0.19 |  |
| Arizona | 2021 | 43 | 1.28 | 0.92 | 1.73 | 0.20 |  |
| Arizona | 2022 | 44 | 1.26 | 0.91 | 1.69 | 0.19 |  |
| Arizona | 2023 | 57 | 1.53 | 1.16 | 1.98 | 0.20 |  |
| Arkansas | 1999 | NA | NA | NA | NA | NA |  |
| Arkansas | 2000 | NA | NA | NA | NA | NA |  |
| Arkansas | 2001 | NA | NA | NA | NA | NA |  |
| Arkansas | 2002 | 10 | 1.06 | 0.46 | 1.78 | 0.31 |  |
| Arkansas | 2003 | NA | NA | NA | NA | NA |  |
| Arkansas | 2004 | NA | NA | NA | NA | NA |  |
| Arkansas | 2005 | NA | NA | NA | NA | NA |  |
| Arkansas | 2006 | NA | NA | NA | NA | NA |  |
| Arkansas | 2007 | NA | NA | NA | NA | NA |  |
| Arkansas | 2008 | NA | NA | NA | NA | NA |  |
| Arkansas | 2009 | NA | NA | NA | NA | NA |  |
| Arkansas | 2010 | 10 | 0.97 | 0.42 | 1.62 | 0.28 |  |
| Arkansas | 2011 | NA | NA | NA | NA | NA |  |
| Arkansas | 2012 | NA | NA | NA | NA | NA |  |
| Arkansas | 2013 | NA | NA | NA | NA | NA |  |
| Arkansas | 2014 | NA | NA | NA | NA | NA |  |
| Arkansas | 2015 | NA | NA | NA | NA | NA |  |
| Arkansas | 2016 | NA | NA | NA | NA | NA |  |
| Arkansas | 2017 | NA | NA | NA | NA | NA |  |
| Arkansas | 2018 | NA | NA | NA | NA | NA |  |
| Arkansas | 2019 | NA | NA | NA | NA | NA |  |
| Arkansas | 2020 | NA | NA | NA | NA | NA |  |
| Arkansas | 2021 | 10 | 0.79 | 0.33 | 1.36 | 0.23 |  |
| Arkansas | 2022 | NA | NA | NA | NA | NA |  |
| Arkansas | 2023 | NA | NA | NA | NA | NA |  |
| California | 1999 | 108 | 1.09 | 0.88 | 1.29 | 0.10 |  |
| California | 2000 | 103 | 1.02 | 0.82 | 1.21 | 0.10 |  |
| California | 2001 | 106 | 1.03 | 0.84 | 1.23 | 0.10 |  |
| California | 2002 | 119 | 1.14 | 0.93 | 1.34 | 0.10 |  |
| California | 2003 | 115 | 1.06 | 0.87 | 1.26 | 0.10 |  |
| California | 2004 | 96 | 0.88 | 0.71 | 1.07 | 0.09 |  |
| California | 2005 | 118 | 1.07 | 0.87 | 1.26 | 0.10 |  |
| California | 2006 | 120 | 1.04 | 0.85 | 1.23 | 0.10 |  |
| California | 2007 | 101 | 0.85 | 0.69 | 1.02 | 0.09 |  |
| California | 2008 | 115 | 0.99 | 0.81 | 1.17 | 0.09 |  |
| California | 2009 | 129 | 1.05 | 0.87 | 1.24 | 0.09 |  |
| California | 2010 | 122 | 1.02 | 0.84 | 1.20 | 0.09 |  |
| California | 2011 | 121 | 0.94 | 0.77 | 1.11 | 0.09 |  |
| California | 2012 | 142 | 1.09 | 0.91 | 1.28 | 0.09 |  |
| California | 2013 | 142 | 1.06 | 0.88 | 1.24 | 0.09 |  |
| California | 2014 | 145 | 1.05 | 0.88 | 1.23 | 0.09 |  |
| California | 2015 | 165 | 1.16 | 0.98 | 1.34 | 0.09 |  |
| California | 2016 | 174 | 1.19 | 1.01 | 1.37 | 0.09 |  |
| California | 2017 | 208 | 1.41 | 1.22 | 1.61 | 0.10 |  |
| California | 2018 | 200 | 1.32 | 1.13 | 1.50 | 0.09 |  |
| California | 2019 | 213 | 1.37 | 1.19 | 1.56 | 0.09 |  |
| California | 2020 | 274 | 1.78 | 1.57 | 1.99 | 0.11 |  |
| California | 2021 | 325 | 2.13 | 1.90 | 2.36 | 0.12 |  |
| California | 2022 | 338 | 2.11 | 1.88 | 2.34 | 0.12 |  |
| California | 2023 | 366 | 2.26 | 2.02 | 2.49 | 0.12 |  |
| Colorado | 1999 | NA | NA | NA | NA | NA |  |
| Colorado | 2000 | 14 | 1.19 | 0.61 | 1.86 | 0.30 |  |
| Colorado | 2001 | 10 | 0.93 | 0.41 | 1.56 | 0.27 |  |
| Colorado | 2002 | 11 | 1.00 | 0.46 | 1.64 | 0.28 |  |
| Colorado | 2003 | 11 | 0.87 | 0.39 | 1.41 | 0.24 |  |
| Colorado | 2004 | NA | NA | NA | NA | NA |  |
| Colorado | 2005 | NA | NA | NA | NA | NA |  |
| Colorado | 2006 | 13 | 0.94 | 0.46 | 1.49 | 0.25 |  |
| Colorado | 2007 | 20 | 1.36 | 0.82 | 2.12 | 0.31 |  |
| Colorado | 2008 | 15 | 1.15 | 0.60 | 1.78 | 0.28 |  |
| Colorado | 2009 | 17 | 1.13 | 0.61 | 1.74 | 0.26 |  |
| Colorado | 2010 | NA | NA | NA | NA | NA |  |
| Colorado | 2011 | 14 | 0.94 | 0.48 | 1.46 | 0.23 |  |
| Colorado | 2012 | 16 | 0.90 | 0.47 | 1.39 | 0.22 |  |
| Colorado | 2013 | 22 | 1.12 | 0.69 | 1.71 | 0.25 |  |
| Colorado | 2014 | 21 | 1.12 | 0.68 | 1.73 | 0.25 |  |
| Colorado | 2015 | 23 | 1.18 | 0.74 | 1.79 | 0.25 |  |
| Colorado | 2016 | 25 | 1.30 | 0.83 | 1.93 | 0.27 |  |
| Colorado | 2017 | 25 | 1.21 | 0.78 | 1.80 | 0.25 |  |
| Colorado | 2018 | 32 | 1.60 | 1.09 | 2.27 | 0.29 |  |
| Colorado | 2019 | 41 | 2.03 | 1.45 | 2.77 | 0.32 |  |
| Colorado | 2020 | 41 | 1.86 | 1.33 | 2.53 | 0.29 |  |
| Colorado | 2021 | 52 | 2.53 | 1.87 | 3.33 | 0.36 |  |
| Colorado | 2022 | 75 | 3.23 | 2.53 | 4.06 | 0.38 |  |
| Colorado | 2023 | 60 | 2.62 | 1.99 | 3.38 | 0.34 |  |
| Connecticut | 1999 | 17 | 1.39 | 0.77 | 2.11 | 0.32 |  |
| Connecticut | 2000 | 16 | 1.27 | 0.68 | 1.95 | 0.30 |  |
| Connecticut | 2001 | 14 | 1.15 | 0.59 | 1.80 | 0.29 |  |
| Connecticut | 2002 | 26 | 1.96 | 1.28 | 2.87 | 0.39 |  |
| Connecticut | 2003 | 15 | 1.20 | 0.63 | 1.85 | 0.29 |  |
| Connecticut | 2004 | 21 | 1.55 | 0.96 | 2.37 | 0.34 |  |
| Connecticut | 2005 | 17 | 1.19 | 0.65 | 1.80 | 0.27 |  |
| Connecticut | 2006 | 16 | 1.20 | 0.64 | 1.83 | 0.28 |  |
| Connecticut | 2007 | 18 | 1.33 | 0.74 | 1.98 | 0.30 |  |
| Connecticut | 2008 | 10 | 0.76 | 0.33 | 1.26 | 0.22 |  |
| Connecticut | 2009 | 20 | 1.45 | 0.89 | 2.24 | 0.33 |  |
| Connecticut | 2010 | 16 | 1.12 | 0.59 | 1.75 | 0.27 |  |
| Connecticut | 2011 | 20 | 1.37 | 0.82 | 2.14 | 0.31 |  |
| Connecticut | 2012 | 20 | 1.36 | 0.83 | 2.09 | 0.31 |  |
| Connecticut | 2013 | 16 | 1.24 | 0.66 | 1.88 | 0.29 |  |
| Connecticut | 2014 | 22 | 1.42 | 0.88 | 2.18 | 0.31 |  |
| Connecticut | 2015 | 24 | 1.55 | 0.98 | 2.33 | 0.32 |  |
| Connecticut | 2016 | 23 | 1.55 | 0.97 | 2.34 | 0.33 |  |
| Connecticut | 2017 | 24 | 1.47 | 0.93 | 2.21 | 0.31 |  |
| Connecticut | 2018 | 27 | 1.61 | 1.05 | 2.36 | 0.31 |  |
| Connecticut | 2019 | 41 | 2.30 | 1.65 | 3.14 | 0.36 |  |
| Connecticut | 2020 | 36 | 2.09 | 1.45 | 2.90 | 0.35 |  |
| Connecticut | 2021 | 39 | 2.37 | 1.67 | 3.25 | 0.38 |  |
| Connecticut | 2022 | 43 | 2.42 | 1.75 | 3.26 | 0.37 |  |
| Connecticut | 2023 | 40 | 2.25 | 1.60 | 3.06 | 0.36 |  |
| Delaware | 1999 | NA | NA | NA | NA | NA |  |
| Delaware | 2000 | NA | NA | NA | NA | NA |  |
| Delaware | 2001 | NA | NA | NA | NA | NA |  |
| Delaware | 2002 | NA | NA | NA | NA | NA |  |
| Delaware | 2003 | NA | NA | NA | NA | NA |  |
| Delaware | 2004 | NA | NA | NA | NA | NA |  |
| Delaware | 2005 | NA | NA | NA | NA | NA |  |
| Delaware | 2006 | NA | NA | NA | NA | NA |  |
| Delaware | 2007 | 0 | 0.00 | 0.00 | 0.00 | 0.00 |  |
| Delaware | 2008 | NA | NA | NA | NA | NA |  |
| Delaware | 2009 | NA | NA | NA | NA | NA |  |
| Delaware | 2010 | NA | NA | NA | NA | NA |  |
| Delaware | 2011 | NA | NA | NA | NA | NA |  |
| Delaware | 2012 | NA | NA | NA | NA | NA |  |
| Delaware | 2013 | NA | NA | NA | NA | NA |  |
| Delaware | 2014 | NA | NA | NA | NA | NA |  |
| Delaware | 2015 | NA | NA | NA | NA | NA |  |
| Delaware | 2016 | NA | NA | NA | NA | NA |  |
| Delaware | 2017 | NA | NA | NA | NA | NA |  |
| Delaware | 2018 | NA | NA | NA | NA | NA |  |
| Delaware | 2019 | NA | NA | NA | NA | NA |  |
| Delaware | 2020 | NA | NA | NA | NA | NA |  |
| Delaware | 2021 | 10 | 2.18 | 0.94 | 3.61 | 0.63 |  |
| Delaware | 2022 | NA | NA | NA | NA | NA |  |
| Delaware | 2023 | 20 | 3.72 | 2.24 | 5.82 | 0.85 |  |
| District of Columbia | 1999 | NA | NA | NA | NA | NA |  |
| District of Columbia | 2000 | NA | NA | NA | NA | NA |  |
| District of Columbia | 2001 | NA | NA | NA | NA | NA |  |
| District of Columbia | 2002 | NA | NA | NA | NA | NA |  |
| District of Columbia | 2003 | NA | NA | NA | NA | NA |  |
| District of Columbia | 2004 | NA | NA | NA | NA | NA |  |
| District of Columbia | 2005 | NA | NA | NA | NA | NA |  |
| District of Columbia | 2006 | NA | NA | NA | NA | NA |  |
| District of Columbia | 2007 | NA | NA | NA | NA | NA |  |
| District of Columbia | 2008 | NA | NA | NA | NA | NA |  |
| District of Columbia | 2009 | NA | NA | NA | NA | NA |  |
| District of Columbia | 2010 | NA | NA | NA | NA | NA |  |
| District of Columbia | 2011 | NA | NA | NA | NA | NA |  |
| District of Columbia | 2012 | NA | NA | NA | NA | NA |  |
| District of Columbia | 2013 | NA | NA | NA | NA | NA |  |
| District of Columbia | 2014 | NA | NA | NA | NA | NA |  |
| District of Columbia | 2015 | NA | NA | NA | NA | NA |  |
| District of Columbia | 2016 | NA | NA | NA | NA | NA |  |
| District of Columbia | 2017 | NA | NA | NA | NA | NA |  |
| District of Columbia | 2018 | 13 | 6.13 | 3.01 | 9.66 | 1.59 |  |
| District of Columbia | 2019 | NA | NA | NA | NA | NA |  |
| District of Columbia | 2020 | 17 | 7.34 | 4.02 | 11.05 | 1.69 |  |
| District of Columbia | 2021 | 14 | 6.26 | 3.19 | 9.77 | 1.57 |  |
| District of Columbia | 2022 | 14 | 6.64 | 3.38 | 10.37 | 1.66 |  |
| District of Columbia | 2023 | 17 | 8.09 | 4.45 | 12.22 | 1.86 |  |
| Florida | 1999 | 45 | 0.65 | 0.47 | 0.88 | 0.10 |  |
| Florida | 2000 | 47 | 0.64 | 0.47 | 0.86 | 0.09 |  |
| Florida | 2001 | 44 | 0.57 | 0.42 | 0.77 | 0.09 |  |
| Florida | 2002 | 45 | 0.56 | 0.41 | 0.75 | 0.08 |  |
| Florida | 2003 | 49 | 0.66 | 0.48 | 0.87 | 0.09 |  |
| Florida | 2004 | 37 | 0.48 | 0.33 | 0.66 | 0.08 |  |
| Florida | 2005 | 41 | 0.48 | 0.34 | 0.66 | 0.08 |  |
| Florida | 2006 | 43 | 0.51 | 0.37 | 0.69 | 0.08 |  |
| Florida | 2007 | 52 | 0.63 | 0.47 | 0.82 | 0.09 |  |
| Florida | 2008 | 56 | 0.63 | 0.48 | 0.82 | 0.09 |  |
| Florida | 2009 | 53 | 0.60 | 0.45 | 0.79 | 0.08 |  |
| Florida | 2010 | 49 | 0.55 | 0.41 | 0.73 | 0.08 |  |
| Florida | 2011 | 56 | 0.63 | 0.48 | 0.83 | 0.09 |  |
| Florida | 2012 | 65 | 0.67 | 0.51 | 0.86 | 0.08 |  |
| Florida | 2013 | 55 | 0.56 | 0.42 | 0.73 | 0.08 |  |
| Florida | 2014 | 89 | 0.88 | 0.70 | 1.08 | 0.09 |  |
| Florida | 2015 | 67 | 0.64 | 0.50 | 0.82 | 0.08 |  |
| Florida | 2016 | 84 | 0.79 | 0.63 | 0.98 | 0.09 |  |
| Florida | 2017 | 90 | 0.82 | 0.66 | 1.01 | 0.09 |  |
| Florida | 2018 | 108 | 0.93 | 0.75 | 1.11 | 0.09 |  |
| Florida | 2019 | 112 | 0.96 | 0.78 | 1.14 | 0.09 |  |
| Florida | 2020 | 155 | 1.23 | 1.04 | 1.43 | 0.10 |  |
| Florida | 2021 | 180 | 1.52 | 1.30 | 1.75 | 0.11 |  |
| Florida | 2022 | 191 | 1.47 | 1.27 | 1.68 | 0.11 |  |
| Florida | 2023 | 224 | 1.74 | 1.51 | 1.97 | 0.12 |  |
| Georgia | 1999 | 13 | 0.63 | 0.31 | 1.01 | 0.16 |  |
| Georgia | 2000 | 21 | 0.94 | 0.58 | 1.43 | 0.21 |  |
| Georgia | 2001 | 15 | 0.69 | 0.36 | 1.06 | 0.17 |  |
| Georgia | 2002 | 15 | 0.66 | 0.34 | 1.02 | 0.16 |  |
| Georgia | 2003 | 22 | 0.92 | 0.57 | 1.40 | 0.20 |  |
| Georgia | 2004 | 15 | 0.66 | 0.34 | 1.01 | 0.16 |  |
| Georgia | 2005 | 19 | 0.73 | 0.41 | 1.09 | 0.16 |  |
| Georgia | 2006 | 10 | 0.39 | 0.17 | 0.64 | 0.11 |  |
| Georgia | 2007 | 15 | 0.56 | 0.29 | 0.89 | 0.14 |  |
| Georgia | 2008 | 21 | 0.73 | 0.45 | 1.13 | 0.16 |  |
| Georgia | 2009 | 24 | 0.77 | 0.49 | 1.15 | 0.16 |  |
| Georgia | 2010 | 23 | 0.79 | 0.49 | 1.19 | 0.17 |  |
| Georgia | 2011 | 16 | 0.57 | 0.31 | 0.87 | 0.14 |  |
| Georgia | 2012 | 25 | 0.77 | 0.49 | 1.14 | 0.16 |  |
| Georgia | 2013 | 24 | 0.69 | 0.43 | 1.03 | 0.14 |  |
| Georgia | 2014 | 23 | 0.70 | 0.44 | 1.06 | 0.15 |  |
| Georgia | 2015 | 37 | 0.98 | 0.68 | 1.36 | 0.17 |  |
| Georgia | 2016 | 31 | 0.88 | 0.59 | 1.25 | 0.16 |  |
| Georgia | 2017 | 39 | 0.96 | 0.68 | 1.32 | 0.16 |  |
| Georgia | 2018 | 30 | 0.77 | 0.51 | 1.10 | 0.14 |  |
| Georgia | 2019 | 44 | 1.10 | 0.80 | 1.49 | 0.17 |  |
| Georgia | 2020 | 39 | 0.94 | 0.67 | 1.29 | 0.15 |  |
| Georgia | 2021 | 51 | 1.21 | 0.89 | 1.60 | 0.17 |  |
| Georgia | 2022 | 37 | 0.90 | 0.63 | 1.25 | 0.15 |  |
| Georgia | 2023 | 60 | 1.47 | 1.12 | 1.90 | 0.19 |  |
| Hawaii | 1999 | NA | NA | NA | NA | NA |  |
| Hawaii | 2000 | NA | NA | NA | NA | NA |  |
| Hawaii | 2001 | NA | NA | NA | NA | NA |  |
| Hawaii | 2002 | NA | NA | NA | NA | NA |  |
| Hawaii | 2003 | NA | NA | NA | NA | NA |  |
| Hawaii | 2004 | NA | NA | NA | NA | NA |  |
| Hawaii | 2005 | NA | NA | NA | NA | NA |  |
| Hawaii | 2006 | NA | NA | NA | NA | NA |  |
| Hawaii | 2007 | NA | NA | NA | NA | NA |  |
| Hawaii | 2008 | NA | NA | NA | NA | NA |  |
| Hawaii | 2009 | NA | NA | NA | NA | NA |  |
| Hawaii | 2010 | NA | NA | NA | NA | NA |  |
| Hawaii | 2011 | NA | NA | NA | NA | NA |  |
| Hawaii | 2012 | NA | NA | NA | NA | NA |  |
| Hawaii | 2013 | NA | NA | NA | NA | NA |  |
| Hawaii | 2014 | NA | NA | NA | NA | NA |  |
| Hawaii | 2015 | 15 | 2.27 | 1.17 | 3.58 | 0.56 |  |
| Hawaii | 2016 | NA | NA | NA | NA | NA |  |
| Hawaii | 2017 | NA | NA | NA | NA | NA |  |
| Hawaii | 2018 | 11 | 1.67 | 0.76 | 2.72 | 0.47 |  |
| Hawaii | 2019 | 11 | 1.64 | 0.72 | 2.78 | 0.47 |  |
| Hawaii | 2020 | NA | NA | NA | NA | NA |  |
| Hawaii | 2021 | 16 | 2.40 | 1.26 | 3.73 | 0.58 |  |
| Hawaii | 2022 | 19 | 2.38 | 1.34 | 3.58 | 0.53 |  |
| Hawaii | 2023 | 14 | 1.90 | 0.94 | 3.02 | 0.49 |  |
| Idaho | 1999 | NA | NA | NA | NA | NA |  |
| Idaho | 2000 | NA | NA | NA | NA | NA |  |
| Idaho | 2001 | NA | NA | NA | NA | NA |  |
| Idaho | 2002 | NA | NA | NA | NA | NA |  |
| Idaho | 2003 | NA | NA | NA | NA | NA |  |
| Idaho | 2004 | NA | NA | NA | NA | NA |  |
| Idaho | 2005 | NA | NA | NA | NA | NA |  |
| Idaho | 2006 | NA | NA | NA | NA | NA |  |
| Idaho | 2007 | NA | NA | NA | NA | NA |  |
| Idaho | 2008 | NA | NA | NA | NA | NA |  |
| Idaho | 2009 | NA | NA | NA | NA | NA |  |
| Idaho | 2010 | NA | NA | NA | NA | NA |  |
| Idaho | 2011 | NA | NA | NA | NA | NA |  |
| Idaho | 2012 | NA | NA | NA | NA | NA |  |
| Idaho | 2013 | NA | NA | NA | NA | NA |  |
| Idaho | 2014 | NA | NA | NA | NA | NA |  |
| Idaho | 2015 | NA | NA | NA | NA | NA |  |
| Idaho | 2016 | NA | NA | NA | NA | NA |  |
| Idaho | 2017 | NA | NA | NA | NA | NA |  |
| Idaho | 2018 | NA | NA | NA | NA | NA |  |
| Idaho | 2019 | 11 | 1.53 | 0.70 | 2.49 | 0.43 |  |
| Idaho | 2020 | 14 | 2.15 | 1.10 | 3.37 | 0.54 |  |
| Idaho | 2021 | 31 | 4.51 | 3.04 | 6.44 | 0.82 |  |
| Idaho | 2022 | 16 | 2.16 | 1.16 | 3.29 | 0.51 |  |
| Idaho | 2023 | 30 | 3.68 | 2.46 | 5.28 | 0.68 |  |
| Illinois | 1999 | 33 | 0.80 | 0.55 | 1.12 | 0.14 |  |
| Illinois | 2000 | 36 | 0.88 | 0.61 | 1.22 | 0.15 |  |
| Illinois | 2001 | 51 | 1.22 | 0.91 | 1.61 | 0.17 |  |
| Illinois | 2002 | 32 | 0.73 | 0.50 | 1.03 | 0.13 |  |
| Illinois | 2003 | 34 | 0.79 | 0.55 | 1.11 | 0.14 |  |
| Illinois | 2004 | 39 | 0.91 | 0.65 | 1.24 | 0.15 |  |
| Illinois | 2005 | 33 | 0.79 | 0.54 | 1.11 | 0.14 |  |
| Illinois | 2006 | 37 | 0.85 | 0.60 | 1.17 | 0.14 |  |
| Illinois | 2007 | 28 | 0.61 | 0.41 | 0.88 | 0.12 |  |
| Illinois | 2008 | 33 | 0.72 | 0.49 | 1.02 | 0.13 |  |
| Illinois | 2009 | 26 | 0.58 | 0.37 | 0.85 | 0.11 |  |
| Illinois | 2010 | 35 | 0.78 | 0.54 | 1.09 | 0.13 |  |
| Illinois | 2011 | 38 | 0.81 | 0.57 | 1.11 | 0.13 |  |
| Illinois | 2012 | 35 | 0.70 | 0.49 | 0.98 | 0.12 |  |
| Illinois | 2013 | 42 | 0.88 | 0.63 | 1.19 | 0.14 |  |
| Illinois | 2014 | 57 | 1.17 | 0.88 | 1.52 | 0.16 |  |
| Illinois | 2015 | 43 | 0.90 | 0.65 | 1.23 | 0.14 |  |
| Illinois | 2016 | 57 | 1.14 | 0.86 | 1.48 | 0.15 |  |
| Illinois | 2017 | 69 | 1.37 | 1.06 | 1.74 | 0.17 |  |
| Illinois | 2018 | 59 | 1.12 | 0.85 | 1.45 | 0.15 |  |
| Illinois | 2019 | 63 | 1.19 | 0.91 | 1.53 | 0.15 |  |
| Illinois | 2020 | 97 | 1.78 | 1.44 | 2.18 | 0.18 |  |
| Illinois | 2021 | 92 | 1.77 | 1.42 | 2.18 | 0.19 |  |
| Illinois | 2022 | 96 | 1.69 | 1.37 | 2.07 | 0.17 |  |
| Illinois | 2023 | 115 | 2.02 | 1.65 | 2.39 | 0.19 |  |
| Indiana | 1999 | 13 | 0.67 | 0.33 | 1.06 | 0.17 |  |
| Indiana | 2000 | 16 | 0.82 | 0.44 | 1.26 | 0.19 |  |
| Indiana | 2001 | 10 | 0.52 | 0.23 | 0.87 | 0.15 |  |
| Indiana | 2002 | 12 | 0.59 | 0.28 | 0.96 | 0.16 |  |
| Indiana | 2003 | NA | NA | NA | NA | NA |  |
| Indiana | 2004 | NA | NA | NA | NA | NA |  |
| Indiana | 2005 | 13 | 0.65 | 0.32 | 1.03 | 0.17 |  |
| Indiana | 2006 | 13 | 0.60 | 0.29 | 0.95 | 0.15 |  |
| Indiana | 2007 | 19 | 0.87 | 0.50 | 1.30 | 0.19 |  |
| Indiana | 2008 | 13 | 0.61 | 0.30 | 0.97 | 0.16 |  |
| Indiana | 2009 | 17 | 0.77 | 0.42 | 1.16 | 0.18 |  |
| Indiana | 2010 | 17 | 0.72 | 0.40 | 1.09 | 0.17 |  |
| Indiana | 2011 | 19 | 0.75 | 0.42 | 1.13 | 0.17 |  |
| Indiana | 2012 | 20 | 0.78 | 0.48 | 1.21 | 0.18 |  |
| Indiana | 2013 | 21 | 0.85 | 0.52 | 1.29 | 0.19 |  |
| Indiana | 2014 | 20 | 0.74 | 0.44 | 1.15 | 0.17 |  |
| Indiana | 2015 | 26 | 0.95 | 0.62 | 1.40 | 0.19 |  |
| Indiana | 2016 | 22 | 0.82 | 0.51 | 1.25 | 0.18 |  |
| Indiana | 2017 | 23 | 0.89 | 0.56 | 1.34 | 0.19 |  |
| Indiana | 2018 | 20 | 0.72 | 0.44 | 1.11 | 0.16 |  |
| Indiana | 2019 | 26 | 0.92 | 0.60 | 1.36 | 0.18 |  |
| Indiana | 2020 | 36 | 1.24 | 0.86 | 1.72 | 0.21 |  |
| Indiana | 2021 | 38 | 1.41 | 0.99 | 1.94 | 0.23 |  |
| Indiana | 2022 | 37 | 1.27 | 0.89 | 1.75 | 0.21 |  |
| Indiana | 2023 | 40 | 1.37 | 0.98 | 1.88 | 0.22 |  |
| Iowa | 1999 | 20 | 1.64 | 1.00 | 2.53 | 0.37 |  |
| Iowa | 2000 | 13 | 1.20 | 0.59 | 1.91 | 0.31 |  |
| Iowa | 2001 | 19 | 1.68 | 0.96 | 2.49 | 0.37 |  |
| Iowa | 2002 | 14 | 1.24 | 0.63 | 1.94 | 0.31 |  |
| Iowa | 2003 | 16 | 1.40 | 0.75 | 2.13 | 0.33 |  |
| Iowa | 2004 | 23 | 1.85 | 1.17 | 2.77 | 0.39 |  |
| Iowa | 2005 | 14 | 1.20 | 0.61 | 1.88 | 0.30 |  |
| Iowa | 2006 | 14 | 1.20 | 0.61 | 1.87 | 0.30 |  |
| Iowa | 2007 | 17 | 1.44 | 0.79 | 2.17 | 0.33 |  |
| Iowa | 2008 | 18 | 1.47 | 0.83 | 2.20 | 0.33 |  |
| Iowa | 2009 | 16 | 1.35 | 0.72 | 2.06 | 0.32 |  |
| Iowa | 2010 | 15 | 1.25 | 0.65 | 1.93 | 0.31 |  |
| Iowa | 2011 | 15 | 1.18 | 0.61 | 1.81 | 0.29 |  |
| Iowa | 2012 | 10 | 0.83 | 0.36 | 1.39 | 0.24 |  |
| Iowa | 2013 | NA | NA | NA | NA | NA |  |
| Iowa | 2014 | 16 | 1.27 | 0.68 | 1.93 | 0.30 |  |
| Iowa | 2015 | 26 | 2.08 | 1.35 | 3.08 | 0.41 |  |
| Iowa | 2016 | 21 | 1.38 | 0.85 | 2.11 | 0.30 |  |
| Iowa | 2017 | 16 | 1.17 | 0.63 | 1.78 | 0.28 |  |
| Iowa | 2018 | 38 | 2.68 | 1.89 | 3.69 | 0.44 |  |
| Iowa | 2019 | 30 | 2.15 | 1.44 | 3.09 | 0.40 |  |
| Iowa | 2020 | 30 | 2.11 | 1.41 | 3.03 | 0.39 |  |
| Iowa | 2021 | 39 | 2.73 | 1.93 | 3.75 | 0.44 |  |
| Iowa | 2022 | 36 | 2.29 | 1.59 | 3.18 | 0.38 |  |
| Iowa | 2023 | 42 | 2.71 | 1.95 | 3.66 | 0.42 |  |
| Kansas | 1999 | 12 | 1.37 | 0.65 | 2.21 | 0.37 |  |
| Kansas | 2000 | 11 | 1.27 | 0.58 | 2.08 | 0.35 |  |
| Kansas | 2001 | NA | NA | NA | NA | NA |  |
| Kansas | 2002 | 11 | 1.20 | 0.55 | 1.96 | 0.33 |  |
| Kansas | 2003 | NA | NA | NA | NA | NA |  |
| Kansas | 2004 | NA | NA | NA | NA | NA |  |
| Kansas | 2005 | NA | NA | NA | NA | NA |  |
| Kansas | 2006 | NA | NA | NA | NA | NA |  |
| Kansas | 2007 | 11 | 1.19 | 0.55 | 1.95 | 0.33 |  |
| Kansas | 2008 | NA | NA | NA | NA | NA |  |
| Kansas | 2009 | NA | NA | NA | NA | NA |  |
| Kansas | 2010 | NA | NA | NA | NA | NA |  |
| Kansas | 2011 | NA | NA | NA | NA | NA |  |
| Kansas | 2012 | NA | NA | NA | NA | NA |  |
| Kansas | 2013 | NA | NA | NA | NA | NA |  |
| Kansas | 2014 | NA | NA | NA | NA | NA |  |
| Kansas | 2015 | NA | NA | NA | NA | NA |  |
| Kansas | 2016 | NA | NA | NA | NA | NA |  |
| Kansas | 2017 | 11 | 1.05 | 0.48 | 1.71 | 0.29 |  |
| Kansas | 2018 | 18 | 1.46 | 0.81 | 2.17 | 0.33 |  |
| Kansas | 2019 | 12 | 1.07 | 0.51 | 1.72 | 0.29 |  |
| Kansas | 2020 | 16 | 1.23 | 0.66 | 1.88 | 0.29 |  |
| Kansas | 2021 | 26 | 2.11 | 1.36 | 3.11 | 0.42 |  |
| Kansas | 2022 | 10 | 0.82 | 0.35 | 1.36 | 0.24 |  |
| Kansas | 2023 | 23 | 1.72 | 1.09 | 2.58 | 0.36 |  |
| Kentucky | 1999 | NA | NA | NA | NA | NA |  |
| Kentucky | 2000 | NA | NA | NA | NA | NA |  |
| Kentucky | 2001 | 18 | 1.34 | 0.75 | 2.00 | 0.30 |  |
| Kentucky | 2002 | 12 | 0.87 | 0.41 | 1.40 | 0.23 |  |
| Kentucky | 2003 | NA | NA | NA | NA | NA |  |
| Kentucky | 2004 | NA | NA | NA | NA | NA |  |
| Kentucky | 2005 | NA | NA | NA | NA | NA |  |
| Kentucky | 2006 | NA | NA | NA | NA | NA |  |
| Kentucky | 2007 | NA | NA | NA | NA | NA |  |
| Kentucky | 2008 | 12 | 0.85 | 0.40 | 1.37 | 0.23 |  |
| Kentucky | 2009 | NA | NA | NA | NA | NA |  |
| Kentucky | 2010 | 10 | 0.70 | 0.30 | 1.17 | 0.20 |  |
| Kentucky | 2011 | NA | NA | NA | NA | NA |  |
| Kentucky | 2012 | NA | NA | NA | NA | NA |  |
| Kentucky | 2013 | 10 | 0.60 | 0.26 | 0.99 | 0.17 |  |
| Kentucky | 2014 | 16 | 0.98 | 0.52 | 1.53 | 0.24 |  |
| Kentucky | 2015 | NA | NA | NA | NA | NA |  |
| Kentucky | 2016 | 11 | 0.67 | 0.31 | 1.10 | 0.19 |  |
| Kentucky | 2017 | 13 | 0.79 | 0.39 | 1.25 | 0.20 |  |
| Kentucky | 2018 | 11 | 0.63 | 0.29 | 1.03 | 0.18 |  |
| Kentucky | 2019 | 16 | 0.88 | 0.46 | 1.36 | 0.21 |  |
| Kentucky | 2020 | 20 | 1.00 | 0.61 | 1.54 | 0.23 |  |
| Kentucky | 2021 | 29 | 1.44 | 0.96 | 2.08 | 0.27 |  |
| Kentucky | 2022 | 17 | 0.86 | 0.47 | 1.29 | 0.20 |  |
| Kentucky | 2023 | 33 | 1.71 | 1.17 | 2.41 | 0.30 |  |
| Louisiana | 1999 | NA | NA | NA | NA | NA |  |
| Louisiana | 2000 | NA | NA | NA | NA | NA |  |
| Louisiana | 2001 | NA | NA | NA | NA | NA |  |
| Louisiana | 2002 | NA | NA | NA | NA | NA |  |
| Louisiana | 2003 | NA | NA | NA | NA | NA |  |
| Louisiana | 2004 | NA | NA | NA | NA | NA |  |
| Louisiana | 2005 | NA | NA | NA | NA | NA |  |
| Louisiana | 2006 | NA | NA | NA | NA | NA |  |
| Louisiana | 2007 | NA | NA | NA | NA | NA |  |
| Louisiana | 2008 | NA | NA | NA | NA | NA |  |
| Louisiana | 2009 | NA | NA | NA | NA | NA |  |
| Louisiana | 2010 | NA | NA | NA | NA | NA |  |
| Louisiana | 2011 | 10 | 0.62 | 0.27 | 1.03 | 0.18 |  |
| Louisiana | 2012 | NA | NA | NA | NA | NA |  |
| Louisiana | 2013 | NA | NA | NA | NA | NA |  |
| Louisiana | 2014 | NA | NA | NA | NA | NA |  |
| Louisiana | 2015 | NA | NA | NA | NA | NA |  |
| Louisiana | 2016 | NA | NA | NA | NA | NA |  |
| Louisiana | 2017 | NA | NA | NA | NA | NA |  |
| Louisiana | 2018 | 13 | 0.75 | 0.37 | 1.18 | 0.19 |  |
| Louisiana | 2019 | 18 | 0.92 | 0.51 | 1.41 | 0.21 |  |
| Louisiana | 2020 | 14 | 0.79 | 0.39 | 1.26 | 0.20 |  |
| Louisiana | 2021 | 17 | 0.99 | 0.53 | 1.51 | 0.23 |  |
| Louisiana | 2022 | 10 | 0.54 | 0.23 | 0.89 | 0.16 |  |
| Louisiana | 2023 | 12 | 0.63 | 0.29 | 1.04 | 0.17 |  |
| Maine | 1999 | NA | NA | NA | NA | NA |  |
| Maine | 2000 | NA | NA | NA | NA | NA |  |
| Maine | 2001 | NA | NA | NA | NA | NA |  |
| Maine | 2002 | NA | NA | NA | NA | NA |  |
| Maine | 2003 | NA | NA | NA | NA | NA |  |
| Maine | 2004 | NA | NA | NA | NA | NA |  |
| Maine | 2005 | NA | NA | NA | NA | NA |  |
| Maine | 2006 | NA | NA | NA | NA | NA |  |
| Maine | 2007 | NA | NA | NA | NA | NA |  |
| Maine | 2008 | NA | NA | NA | NA | NA |  |
| Maine | 2009 | NA | NA | NA | NA | NA |  |
| Maine | 2010 | NA | NA | NA | NA | NA |  |
| Maine | 2011 | NA | NA | NA | NA | NA |  |
| Maine | 2012 | NA | NA | NA | NA | NA |  |
| Maine | 2013 | NA | NA | NA | NA | NA |  |
| Maine | 2014 | 12 | 2.00 | 0.95 | 3.21 | 0.54 |  |
| Maine | 2015 | 11 | 1.77 | 0.81 | 2.89 | 0.49 |  |
| Maine | 2016 | 10 | 1.68 | 0.73 | 2.80 | 0.49 |  |
| Maine | 2017 | 10 | 1.56 | 0.68 | 2.60 | 0.45 |  |
| Maine | 2018 | 18 | 2.57 | 1.44 | 3.84 | 0.58 |  |
| Maine | 2019 | 17 | 2.44 | 1.34 | 3.68 | 0.56 |  |
| Maine | 2020 | 26 | 3.33 | 2.16 | 4.92 | 0.66 |  |
| Maine | 2021 | 22 | 3.07 | 1.92 | 4.65 | 0.66 |  |
| Maine | 2022 | 31 | 4.10 | 2.78 | 5.81 | 0.74 |  |
| Maine | 2023 | 20 | 2.53 | 1.54 | 3.90 | 0.57 |  |
| Maryland | 1999 | 18 | 1.11 | 0.62 | 1.66 | 0.25 |  |
| Maryland | 2000 | 18 | 1.12 | 0.63 | 1.68 | 0.25 |  |
| Maryland | 2001 | 21 | 1.22 | 0.76 | 1.87 | 0.27 |  |
| Maryland | 2002 | 21 | 1.23 | 0.76 | 1.88 | 0.27 |  |
| Maryland | 2003 | 19 | 1.06 | 0.60 | 1.56 | 0.23 |  |
| Maryland | 2004 | 18 | 1.01 | 0.57 | 1.51 | 0.23 |  |
| Maryland | 2005 | 15 | 0.85 | 0.44 | 1.31 | 0.21 |  |
| Maryland | 2006 | 12 | 0.69 | 0.33 | 1.11 | 0.18 |  |
| Maryland | 2007 | 24 | 1.29 | 0.83 | 1.92 | 0.27 |  |
| Maryland | 2008 | 21 | 1.12 | 0.69 | 1.71 | 0.25 |  |
| Maryland | 2009 | 24 | 1.24 | 0.80 | 1.85 | 0.26 |  |
| Maryland | 2010 | 21 | 1.13 | 0.70 | 1.72 | 0.25 |  |
| Maryland | 2011 | 26 | 1.26 | 0.82 | 1.87 | 0.25 |  |
| Maryland | 2012 | 22 | 1.03 | 0.64 | 1.57 | 0.22 |  |
| Maryland | 2013 | 19 | 0.88 | 0.50 | 1.33 | 0.20 |  |
| Maryland | 2014 | 30 | 1.39 | 0.93 | 1.99 | 0.26 |  |
| Maryland | 2015 | 32 | 1.45 | 0.98 | 2.06 | 0.26 |  |
| Maryland | 2016 | 32 | 1.43 | 0.97 | 2.04 | 0.26 |  |
| Maryland | 2017 | 45 | 1.86 | 1.35 | 2.51 | 0.28 |  |
| Maryland | 2018 | 43 | 1.81 | 1.31 | 2.45 | 0.28 |  |
| Maryland | 2019 | 45 | 1.68 | 1.22 | 2.25 | 0.25 |  |
| Maryland | 2020 | 67 | 2.62 | 2.03 | 3.34 | 0.32 |  |
| Maryland | 2021 | 89 | 3.52 | 2.82 | 4.34 | 0.38 |  |
| Maryland | 2022 | 80 | 2.88 | 2.28 | 3.60 | 0.33 |  |
| Maryland | 2023 | 103 | 3.75 | 3.02 | 4.47 | 0.37 |  |
| Massachusetts | 1999 | 29 | 1.22 | 0.81 | 1.75 | 0.23 |  |
| Massachusetts | 2000 | 29 | 1.22 | 0.82 | 1.75 | 0.23 |  |
| Massachusetts | 2001 | 24 | 1.02 | 0.65 | 1.52 | 0.21 |  |
| Massachusetts | 2002 | 18 | 0.77 | 0.43 | 1.15 | 0.17 |  |
| Massachusetts | 2003 | 34 | 1.37 | 0.95 | 1.91 | 0.24 |  |
| Massachusetts | 2004 | 21 | 0.84 | 0.52 | 1.28 | 0.18 |  |
| Massachusetts | 2005 | 29 | 1.18 | 0.79 | 1.69 | 0.22 |  |
| Massachusetts | 2006 | 30 | 1.26 | 0.85 | 1.80 | 0.23 |  |
| Massachusetts | 2007 | 27 | 1.05 | 0.69 | 1.53 | 0.20 |  |
| Massachusetts | 2008 | 38 | 1.51 | 1.07 | 2.07 | 0.25 |  |
| Massachusetts | 2009 | 34 | 1.36 | 0.94 | 1.90 | 0.24 |  |
| Massachusetts | 2010 | 24 | 0.94 | 0.59 | 1.41 | 0.19 |  |
| Massachusetts | 2011 | 48 | 1.81 | 1.33 | 2.41 | 0.26 |  |
| Massachusetts | 2012 | 41 | 1.51 | 1.08 | 2.06 | 0.24 |  |
| Massachusetts | 2013 | 36 | 1.32 | 0.92 | 1.83 | 0.22 |  |
| Massachusetts | 2014 | 59 | 2.17 | 1.64 | 2.81 | 0.29 |  |
| Massachusetts | 2015 | 71 | 2.49 | 1.94 | 3.16 | 0.30 |  |
| Massachusetts | 2016 | 55 | 1.84 | 1.38 | 2.41 | 0.25 |  |
| Massachusetts | 2017 | 73 | 2.50 | 1.95 | 3.16 | 0.30 |  |
| Massachusetts | 2018 | 79 | 2.56 | 2.02 | 3.20 | 0.29 |  |
| Massachusetts | 2019 | 93 | 2.98 | 2.40 | 3.66 | 0.31 |  |
| Massachusetts | 2020 | 98 | 3.08 | 2.49 | 3.76 | 0.31 |  |
| Massachusetts | 2021 | 122 | 3.92 | 3.22 | 4.62 | 0.36 |  |
| Massachusetts | 2022 | 121 | 3.65 | 2.99 | 4.30 | 0.33 |  |
| Massachusetts | 2023 | 136 | 4.16 | 3.45 | 4.86 | 0.36 |  |
| Michigan | 1999 | 17 | 0.56 | 0.31 | 0.84 | 0.13 |  |
| Michigan | 2000 | 29 | 0.82 | 0.55 | 1.18 | 0.15 |  |
| Michigan | 2001 | 27 | 0.82 | 0.54 | 1.19 | 0.16 |  |
| Michigan | 2002 | 26 | 0.72 | 0.47 | 1.06 | 0.14 |  |
| Michigan | 2003 | 17 | 0.49 | 0.27 | 0.74 | 0.11 |  |
| Michigan | 2004 | 28 | 0.79 | 0.53 | 1.15 | 0.15 |  |
| Michigan | 2005 | 32 | 0.90 | 0.62 | 1.27 | 0.16 |  |
| Michigan | 2006 | 24 | 0.67 | 0.43 | 0.99 | 0.14 |  |
| Michigan | 2007 | 30 | 0.79 | 0.53 | 1.13 | 0.15 |  |
| Michigan | 2008 | 37 | 0.98 | 0.69 | 1.35 | 0.16 |  |
| Michigan | 2009 | 32 | 0.82 | 0.56 | 1.16 | 0.15 |  |
| Michigan | 2010 | 27 | 0.71 | 0.46 | 1.04 | 0.14 |  |
| Michigan | 2011 | 33 | 0.86 | 0.59 | 1.22 | 0.15 |  |
| Michigan | 2012 | 28 | 0.65 | 0.43 | 0.94 | 0.12 |  |
| Michigan | 2013 | 31 | 0.72 | 0.49 | 1.03 | 0.13 |  |
| Michigan | 2014 | 35 | 0.81 | 0.56 | 1.14 | 0.14 |  |
| Michigan | 2015 | 43 | 0.99 | 0.71 | 1.34 | 0.15 |  |
| Michigan | 2016 | 60 | 1.33 | 1.01 | 1.71 | 0.17 |  |
| Michigan | 2017 | 39 | 0.94 | 0.66 | 1.29 | 0.15 |  |
| Michigan | 2018 | 48 | 1.09 | 0.80 | 1.46 | 0.16 |  |
| Michigan | 2019 | 53 | 1.13 | 0.85 | 1.48 | 0.16 |  |
| Michigan | 2020 | 80 | 1.69 | 1.33 | 2.10 | 0.19 |  |
| Michigan | 2021 | 71 | 1.55 | 1.21 | 1.97 | 0.19 |  |
| Michigan | 2022 | 87 | 1.83 | 1.46 | 2.27 | 0.20 |  |
| Michigan | 2023 | 105 | 2.24 | 1.80 | 2.67 | 0.22 |  |
| Minnesota | 1999 | 20 | 1.19 | 0.73 | 1.83 | 0.27 |  |
| Minnesota | 2000 | 25 | 1.53 | 0.99 | 2.26 | 0.31 |  |
| Minnesota | 2001 | 24 | 1.43 | 0.91 | 2.12 | 0.29 |  |
| Minnesota | 2002 | 26 | 1.51 | 0.99 | 2.22 | 0.30 |  |
| Minnesota | 2003 | 22 | 1.27 | 0.80 | 1.92 | 0.27 |  |
| Minnesota | 2004 | 30 | 1.70 | 1.15 | 2.43 | 0.31 |  |
| Minnesota | 2005 | 22 | 1.23 | 0.77 | 1.86 | 0.26 |  |
| Minnesota | 2006 | 33 | 1.77 | 1.21 | 2.50 | 0.31 |  |
| Minnesota | 2007 | 24 | 1.30 | 0.84 | 1.94 | 0.27 |  |
| Minnesota | 2008 | 18 | 1.00 | 0.56 | 1.49 | 0.22 |  |
| Minnesota | 2009 | 27 | 1.38 | 0.90 | 2.02 | 0.27 |  |
| Minnesota | 2010 | 34 | 1.76 | 1.21 | 2.47 | 0.30 |  |
| Minnesota | 2011 | 35 | 1.65 | 1.15 | 2.31 | 0.28 |  |
| Minnesota | 2012 | 42 | 1.99 | 1.43 | 2.70 | 0.31 |  |
| Minnesota | 2013 | 40 | 1.90 | 1.35 | 2.60 | 0.30 |  |
| Minnesota | 2014 | 36 | 1.74 | 1.21 | 2.42 | 0.29 |  |
| Minnesota | 2015 | 54 | 2.35 | 1.76 | 3.09 | 0.33 |  |
| Minnesota | 2016 | 57 | 2.64 | 2.00 | 3.43 | 0.35 |  |
| Minnesota | 2017 | 62 | 2.79 | 2.13 | 3.59 | 0.36 |  |
| Minnesota | 2018 | 65 | 2.78 | 2.14 | 3.55 | 0.35 |  |
| Minnesota | 2019 | 85 | 3.54 | 2.82 | 4.39 | 0.39 |  |
| Minnesota | 2020 | 88 | 3.47 | 2.77 | 4.29 | 0.38 |  |
| Minnesota | 2021 | 95 | 4.03 | 3.26 | 4.93 | 0.42 |  |
| Minnesota | 2022 | 129 | 4.97 | 4.10 | 5.83 | 0.44 |  |
| Minnesota | 2023 | 127 | 4.89 | 4.03 | 5.74 | 0.44 |  |
| Mississippi | 1999 | NA | NA | NA | NA | NA |  |
| Mississippi | 2000 | NA | NA | NA | NA | NA |  |
| Mississippi | 2001 | NA | NA | NA | NA | NA |  |
| Mississippi | 2002 | NA | NA | NA | NA | NA |  |
| Mississippi | 2003 | NA | NA | NA | NA | NA |  |
| Mississippi | 2004 | NA | NA | NA | NA | NA |  |
| Mississippi | 2005 | NA | NA | NA | NA | NA |  |
| Mississippi | 2006 | NA | NA | NA | NA | NA |  |
| Mississippi | 2007 | NA | NA | NA | NA | NA |  |
| Mississippi | 2008 | NA | NA | NA | NA | NA |  |
| Mississippi | 2009 | NA | NA | NA | NA | NA |  |
| Mississippi | 2010 | NA | NA | NA | NA | NA |  |
| Mississippi | 2011 | NA | NA | NA | NA | NA |  |
| Mississippi | 2012 | NA | NA | NA | NA | NA |  |
| Mississippi | 2013 | NA | NA | NA | NA | NA |  |
| Mississippi | 2014 | NA | NA | NA | NA | NA |  |
| Mississippi | 2015 | NA | NA | NA | NA | NA |  |
| Mississippi | 2016 | NA | NA | NA | NA | NA |  |
| Mississippi | 2017 | NA | NA | NA | NA | NA |  |
| Mississippi | 2018 | NA | NA | NA | NA | NA |  |
| Mississippi | 2019 | NA | NA | NA | NA | NA |  |
| Mississippi | 2020 | 14 | 1.21 | 0.61 | 1.88 | 0.30 |  |
| Mississippi | 2021 | 11 | 0.95 | 0.43 | 1.55 | 0.26 |  |
| Mississippi | 2022 | 13 | 1.05 | 0.52 | 1.67 | 0.27 |  |
| Mississippi | 2023 | 13 | 1.15 | 0.56 | 1.81 | 0.30 |  |
| Missouri | 1999 | 17 | 0.85 | 0.47 | 1.29 | 0.20 |  |
| Missouri | 2000 | 26 | 1.27 | 0.83 | 1.86 | 0.25 |  |
| Missouri | 2001 | 16 | 0.80 | 0.43 | 1.23 | 0.19 |  |
| Missouri | 2002 | 26 | 1.23 | 0.81 | 1.81 | 0.24 |  |
| Missouri | 2003 | 17 | 0.85 | 0.47 | 1.29 | 0.20 |  |
| Missouri | 2004 | 13 | 0.66 | 0.33 | 1.05 | 0.17 |  |
| Missouri | 2005 | 16 | 0.75 | 0.40 | 1.15 | 0.18 |  |
| Missouri | 2006 | 18 | 0.83 | 0.47 | 1.25 | 0.19 |  |
| Missouri | 2007 | 16 | 0.77 | 0.42 | 1.18 | 0.18 |  |
| Missouri | 2008 | 25 | 1.04 | 0.67 | 1.53 | 0.21 |  |
| Missouri | 2009 | 10 | 0.47 | 0.20 | 0.79 | 0.14 |  |
| Missouri | 2010 | 17 | 0.78 | 0.43 | 1.18 | 0.18 |  |
| Missouri | 2011 | 19 | 0.87 | 0.50 | 1.28 | 0.19 |  |
| Missouri | 2012 | 22 | 0.89 | 0.56 | 1.35 | 0.19 |  |
| Missouri | 2013 | 19 | 0.81 | 0.46 | 1.21 | 0.18 |  |
| Missouri | 2014 | 24 | 0.90 | 0.57 | 1.33 | 0.18 |  |
| Missouri | 2015 | 17 | 0.72 | 0.39 | 1.08 | 0.16 |  |
| Missouri | 2016 | 27 | 1.05 | 0.69 | 1.54 | 0.20 |  |
| Missouri | 2017 | 25 | 0.90 | 0.59 | 1.34 | 0.18 |  |
| Missouri | 2018 | 26 | 0.98 | 0.64 | 1.43 | 0.19 |  |
| Missouri | 2019 | 28 | 1.01 | 0.66 | 1.46 | 0.19 |  |
| Missouri | 2020 | 41 | 1.45 | 1.04 | 1.97 | 0.23 |  |
| Missouri | 2021 | 40 | 1.48 | 1.05 | 2.02 | 0.24 |  |
| Missouri | 2022 | 49 | 1.70 | 1.26 | 2.26 | 0.24 |  |
| Missouri | 2023 | 39 | 1.34 | 0.95 | 1.83 | 0.22 |  |
| Montana | 1999 | NA | NA | NA | NA | NA |  |
| Montana | 2000 | 0 | 0.00 | 0.00 | 0.00 | 0.00 |  |
| Montana | 2001 | NA | NA | NA | NA | NA |  |
| Montana | 2002 | NA | NA | NA | NA | NA |  |
| Montana | 2003 | NA | NA | NA | NA | NA |  |
| Montana | 2004 | NA | NA | NA | NA | NA |  |
| Montana | 2005 | NA | NA | NA | NA | NA |  |
| Montana | 2006 | NA | NA | NA | NA | NA |  |
| Montana | 2007 | 0 | 0.00 | 0.00 | 0.00 | 0.00 |  |
| Montana | 2008 | NA | NA | NA | NA | NA |  |
| Montana | 2009 | NA | NA | NA | NA | NA |  |
| Montana | 2010 | NA | NA | NA | NA | NA |  |
| Montana | 2011 | NA | NA | NA | NA | NA |  |
| Montana | 2012 | NA | NA | NA | NA | NA |  |
| Montana | 2013 | NA | NA | NA | NA | NA |  |
| Montana | 2014 | NA | NA | NA | NA | NA |  |
| Montana | 2015 | NA | NA | NA | NA | NA |  |
| Montana | 2016 | NA | NA | NA | NA | NA |  |
| Montana | 2017 | NA | NA | NA | NA | NA |  |
| Montana | 2018 | NA | NA | NA | NA | NA |  |
| Montana | 2019 | 10 | 2.31 | 1.01 | 3.86 | 0.67 |  |
| Montana | 2020 | NA | NA | NA | NA | NA |  |
| Montana | 2021 | 11 | 2.54 | 1.15 | 4.13 | 0.71 |  |
| Montana | 2022 | 16 | 3.03 | 1.63 | 4.62 | 0.72 |  |
| Montana | 2023 | NA | NA | NA | NA | NA |  |
| Nebraska | 1999 | NA | NA | NA | NA | NA |  |
| Nebraska | 2000 | NA | NA | NA | NA | NA |  |
| Nebraska | 2001 | NA | NA | NA | NA | NA |  |
| Nebraska | 2002 | NA | NA | NA | NA | NA |  |
| Nebraska | 2003 | NA | NA | NA | NA | NA |  |
| Nebraska | 2004 | NA | NA | NA | NA | NA |  |
| Nebraska | 2005 | NA | NA | NA | NA | NA |  |
| Nebraska | 2006 | NA | NA | NA | NA | NA |  |
| Nebraska | 2007 | NA | NA | NA | NA | NA |  |
| Nebraska | 2008 | NA | NA | NA | NA | NA |  |
| Nebraska | 2009 | NA | NA | NA | NA | NA |  |
| Nebraska | 2010 | 12 | 1.96 | 0.94 | 3.16 | 0.52 |  |
| Nebraska | 2011 | NA | NA | NA | NA | NA |  |
| Nebraska | 2012 | NA | NA | NA | NA | NA |  |
| Nebraska | 2013 | NA | NA | NA | NA | NA |  |
| Nebraska | 2014 | NA | NA | NA | NA | NA |  |
| Nebraska | 2015 | NA | NA | NA | NA | NA |  |
| Nebraska | 2016 | 12 | 1.62 | 0.77 | 2.60 | 0.44 |  |
| Nebraska | 2017 | 10 | 1.44 | 0.62 | 2.38 | 0.42 |  |
| Nebraska | 2018 | 13 | 1.62 | 0.80 | 2.56 | 0.42 |  |
| Nebraska | 2019 | 11 | 1.59 | 0.72 | 2.58 | 0.44 |  |
| Nebraska | 2020 | 20 | 2.35 | 1.43 | 3.63 | 0.53 |  |
| Nebraska | 2021 | 15 | 1.96 | 1.02 | 3.01 | 0.48 |  |
| Nebraska | 2022 | 14 | 1.78 | 0.90 | 2.77 | 0.45 |  |
| Nebraska | 2023 | 25 | 2.83 | 1.83 | 4.18 | 0.57 |  |
| Nevada | 1999 | NA | NA | NA | NA | NA |  |
| Nevada | 2000 | NA | NA | NA | NA | NA |  |
| Nevada | 2001 | NA | NA | NA | NA | NA |  |
| Nevada | 2002 | 0 | 0.00 | 0.00 | 0.00 | 0.00 |  |
| Nevada | 2003 | NA | NA | NA | NA | NA |  |
| Nevada | 2004 | NA | NA | NA | NA | NA |  |
| Nevada | 2005 | NA | NA | NA | NA | NA |  |
| Nevada | 2006 | NA | NA | NA | NA | NA |  |
| Nevada | 2007 | NA | NA | NA | NA | NA |  |
| Nevada | 2008 | NA | NA | NA | NA | NA |  |
| Nevada | 2009 | NA | NA | NA | NA | NA |  |
| Nevada | 2010 | NA | NA | NA | NA | NA |  |
| Nevada | 2011 | NA | NA | NA | NA | NA |  |
| Nevada | 2012 | NA | NA | NA | NA | NA |  |
| Nevada | 2013 | NA | NA | NA | NA | NA |  |
| Nevada | 2014 | NA | NA | NA | NA | NA |  |
| Nevada | 2015 | NA | NA | NA | NA | NA |  |
| Nevada | 2016 | 12 | 1.15 | 0.53 | 1.92 | 0.32 |  |
| Nevada | 2017 | 11 | 0.99 | 0.44 | 1.67 | 0.28 |  |
| Nevada | 2018 | NA | NA | NA | NA | NA |  |
| Nevada | 2019 | 13 | 1.00 | 0.49 | 1.59 | 0.26 |  |
| Nevada | 2020 | 12 | 1.03 | 0.49 | 1.65 | 0.28 |  |
| Nevada | 2021 | 15 | 1.28 | 0.66 | 2.02 | 0.32 |  |
| Nevada | 2022 | 11 | 0.90 | 0.41 | 1.45 | 0.25 |  |
| Nevada | 2023 | 20 | 1.45 | 0.87 | 2.27 | 0.33 |  |
| New Hampshire | 1999 | NA | NA | NA | NA | NA |  |
| New Hampshire | 2000 | NA | NA | NA | NA | NA |  |
| New Hampshire | 2001 | NA | NA | NA | NA | NA |  |
| New Hampshire | 2002 | NA | NA | NA | NA | NA |  |
| New Hampshire | 2003 | NA | NA | NA | NA | NA |  |
| New Hampshire | 2004 | 13 | 3.16 | 1.56 | 5.02 | 0.82 |  |
| New Hampshire | 2005 | NA | NA | NA | NA | NA |  |
| New Hampshire | 2006 | NA | NA | NA | NA | NA |  |
| New Hampshire | 2007 | NA | NA | NA | NA | NA |  |
| New Hampshire | 2008 | NA | NA | NA | NA | NA |  |
| New Hampshire | 2009 | NA | NA | NA | NA | NA |  |
| New Hampshire | 2010 | NA | NA | NA | NA | NA |  |
| New Hampshire | 2011 | NA | NA | NA | NA | NA |  |
| New Hampshire | 2012 | NA | NA | NA | NA | NA |  |
| New Hampshire | 2013 | NA | NA | NA | NA | NA |  |
| New Hampshire | 2014 | NA | NA | NA | NA | NA |  |
| New Hampshire | 2015 | NA | NA | NA | NA | NA |  |
| New Hampshire | 2016 | 12 | 2.25 | 1.07 | 3.61 | 0.61 |  |
| New Hampshire | 2017 | 11 | 1.86 | 0.82 | 3.15 | 0.53 |  |
| New Hampshire | 2018 | 12 | 2.04 | 0.97 | 3.27 | 0.55 |  |
| New Hampshire | 2019 | NA | NA | NA | NA | NA |  |
| New Hampshire | 2020 | 15 | 2.35 | 1.23 | 3.62 | 0.57 |  |
| New Hampshire | 2021 | 19 | 3.09 | 1.74 | 4.65 | 0.69 |  |
| New Hampshire | 2022 | 11 | 1.71 | 0.78 | 2.79 | 0.47 |  |
| New Hampshire | 2023 | 18 | 2.72 | 1.52 | 4.06 | 0.61 |  |
| New Jersey | 1999 | 17 | 0.61 | 0.33 | 0.92 | 0.14 |  |
| New Jersey | 2000 | 27 | 0.89 | 0.59 | 1.30 | 0.17 |  |
| New Jersey | 2001 | 17 | 0.58 | 0.32 | 0.87 | 0.13 |  |
| New Jersey | 2002 | 22 | 0.70 | 0.44 | 1.07 | 0.15 |  |
| New Jersey | 2003 | 21 | 0.67 | 0.41 | 1.02 | 0.15 |  |
| New Jersey | 2004 | 22 | 0.72 | 0.45 | 1.09 | 0.15 |  |
| New Jersey | 2005 | 24 | 0.75 | 0.48 | 1.11 | 0.15 |  |
| New Jersey | 2006 | 22 | 0.68 | 0.43 | 1.03 | 0.15 |  |
| New Jersey | 2007 | 27 | 0.79 | 0.52 | 1.16 | 0.15 |  |
| New Jersey | 2008 | 40 | 1.18 | 0.84 | 1.61 | 0.19 |  |
| New Jersey | 2009 | 23 | 0.68 | 0.43 | 1.01 | 0.14 |  |
| New Jersey | 2010 | 36 | 1.02 | 0.71 | 1.41 | 0.17 |  |
| New Jersey | 2011 | 34 | 1.00 | 0.69 | 1.39 | 0.17 |  |
| New Jersey | 2012 | 28 | 0.78 | 0.51 | 1.14 | 0.15 |  |
| New Jersey | 2013 | 38 | 1.03 | 0.73 | 1.42 | 0.17 |  |
| New Jersey | 2014 | 45 | 1.19 | 0.86 | 1.60 | 0.18 |  |
| New Jersey | 2015 | 37 | 1.05 | 0.74 | 1.45 | 0.18 |  |
| New Jersey | 2016 | 45 | 1.14 | 0.83 | 1.53 | 0.17 |  |
| New Jersey | 2017 | 42 | 1.11 | 0.80 | 1.51 | 0.17 |  |
| New Jersey | 2018 | 51 | 1.32 | 0.97 | 1.74 | 0.19 |  |
| New Jersey | 2019 | 53 | 1.31 | 0.97 | 1.72 | 0.18 |  |
| New Jersey | 2020 | 60 | 1.47 | 1.12 | 1.90 | 0.19 |  |
| New Jersey | 2021 | 74 | 1.84 | 1.44 | 2.32 | 0.22 |  |
| New Jersey | 2022 | 72 | 1.68 | 1.32 | 2.12 | 0.20 |  |
| New Jersey | 2023 | 80 | 1.91 | 1.51 | 2.38 | 0.22 |  |
| New Mexico | 1999 | NA | NA | NA | NA | NA |  |
| New Mexico | 2000 | NA | NA | NA | NA | NA |  |
| New Mexico | 2001 | NA | NA | NA | NA | NA |  |
| New Mexico | 2002 | NA | NA | NA | NA | NA |  |
| New Mexico | 2003 | NA | NA | NA | NA | NA |  |
| New Mexico | 2004 | NA | NA | NA | NA | NA |  |
| New Mexico | 2005 | NA | NA | NA | NA | NA |  |
| New Mexico | 2006 | NA | NA | NA | NA | NA |  |
| New Mexico | 2007 | NA | NA | NA | NA | NA |  |
| New Mexico | 2008 | NA | NA | NA | NA | NA |  |
| New Mexico | 2009 | 10 | 1.52 | 0.66 | 2.54 | 0.44 |  |
| New Mexico | 2010 | NA | NA | NA | NA | NA |  |
| New Mexico | 2011 | NA | NA | NA | NA | NA |  |
| New Mexico | 2012 | NA | NA | NA | NA | NA |  |
| New Mexico | 2013 | NA | NA | NA | NA | NA |  |
| New Mexico | 2014 | NA | NA | NA | NA | NA |  |
| New Mexico | 2015 | NA | NA | NA | NA | NA |  |
| New Mexico | 2016 | NA | NA | NA | NA | NA |  |
| New Mexico | 2017 | 10 | 1.24 | 0.54 | 2.05 | 0.36 |  |
| New Mexico | 2018 | 13 | 1.45 | 0.71 | 2.29 | 0.38 |  |
| New Mexico | 2019 | 14 | 1.51 | 0.77 | 2.36 | 0.38 |  |
| New Mexico | 2020 | NA | NA | NA | NA | NA |  |
| New Mexico | 2021 | 15 | 1.59 | 0.83 | 2.45 | 0.39 |  |
| New Mexico | 2022 | NA | NA | NA | NA | NA |  |
| New Mexico | 2023 | 15 | 1.60 | 0.82 | 2.52 | 0.40 |  |
| New York | 1999 | 51 | 0.78 | 0.58 | 1.02 | 0.11 |  |
| New York | 2000 | 65 | 0.96 | 0.74 | 1.22 | 0.12 |  |
| New York | 2001 | 57 | 0.82 | 0.62 | 1.07 | 0.11 |  |
| New York | 2002 | 60 | 0.89 | 0.68 | 1.14 | 0.11 |  |
| New York | 2003 | 64 | 0.92 | 0.71 | 1.17 | 0.11 |  |
| New York | 2004 | 58 | 0.81 | 0.61 | 1.05 | 0.11 |  |
| New York | 2005 | 61 | 0.84 | 0.64 | 1.08 | 0.11 |  |
| New York | 2006 | 60 | 0.87 | 0.66 | 1.12 | 0.11 |  |
| New York | 2007 | 83 | 1.13 | 0.90 | 1.40 | 0.12 |  |
| New York | 2008 | 87 | 1.17 | 0.94 | 1.45 | 0.13 |  |
| New York | 2009 | 98 | 1.31 | 1.06 | 1.59 | 0.13 |  |
| New York | 2010 | 71 | 0.94 | 0.73 | 1.19 | 0.11 |  |
| New York | 2011 | 71 | 0.93 | 0.73 | 1.18 | 0.11 |  |
| New York | 2012 | 77 | 0.97 | 0.76 | 1.21 | 0.11 |  |
| New York | 2013 | 102 | 1.32 | 1.06 | 1.58 | 0.13 |  |
| New York | 2014 | 109 | 1.31 | 1.06 | 1.56 | 0.13 |  |
| New York | 2015 | 127 | 1.61 | 1.32 | 1.89 | 0.14 |  |
| New York | 2016 | 132 | 1.59 | 1.31 | 1.86 | 0.14 |  |
| New York | 2017 | 128 | 1.48 | 1.22 | 1.74 | 0.13 |  |
| New York | 2018 | 140 | 1.65 | 1.37 | 1.93 | 0.14 |  |
| New York | 2019 | 148 | 1.72 | 1.44 | 2.00 | 0.14 |  |
| New York | 2020 | 166 | 1.80 | 1.52 | 2.08 | 0.14 |  |
| New York | 2021 | 185 | 2.02 | 1.72 | 2.31 | 0.15 |  |
| New York | 2022 | 221 | 2.34 | 2.03 | 2.65 | 0.16 |  |
| New York | 2023 | 223 | 2.32 | 2.02 | 2.63 | 0.16 |  |
| North Carolina | 1999 | 26 | 0.99 | 0.65 | 1.45 | 0.19 |  |
| North Carolina | 2000 | 19 | 0.77 | 0.44 | 1.14 | 0.17 |  |
| North Carolina | 2001 | 20 | 0.72 | 0.44 | 1.11 | 0.16 |  |
| North Carolina | 2002 | 33 | 1.19 | 0.82 | 1.67 | 0.21 |  |
| North Carolina | 2003 | 23 | 0.82 | 0.52 | 1.23 | 0.17 |  |
| North Carolina | 2004 | 24 | 0.83 | 0.53 | 1.24 | 0.17 |  |
| North Carolina | 2005 | 39 | 1.24 | 0.88 | 1.70 | 0.20 |  |
| North Carolina | 2006 | 27 | 0.83 | 0.54 | 1.21 | 0.16 |  |
| North Carolina | 2007 | 40 | 1.28 | 0.92 | 1.74 | 0.20 |  |
| North Carolina | 2008 | 36 | 1.06 | 0.74 | 1.47 | 0.18 |  |
| North Carolina | 2009 | 28 | 0.80 | 0.53 | 1.17 | 0.15 |  |
| North Carolina | 2010 | 30 | 0.86 | 0.58 | 1.24 | 0.16 |  |
| North Carolina | 2011 | 34 | 0.96 | 0.66 | 1.34 | 0.17 |  |
| North Carolina | 2012 | 34 | 0.91 | 0.63 | 1.28 | 0.16 |  |
| North Carolina | 2013 | 47 | 1.28 | 0.94 | 1.71 | 0.19 |  |
| North Carolina | 2014 | 28 | 0.71 | 0.47 | 1.04 | 0.14 |  |
| North Carolina | 2015 | 50 | 1.20 | 0.89 | 1.59 | 0.17 |  |
| North Carolina | 2016 | 58 | 1.43 | 1.08 | 1.86 | 0.19 |  |
| North Carolina | 2017 | 45 | 1.07 | 0.78 | 1.45 | 0.16 |  |
| North Carolina | 2018 | 51 | 1.17 | 0.86 | 1.55 | 0.17 |  |
| North Carolina | 2019 | 81 | 1.77 | 1.40 | 2.20 | 0.20 |  |
| North Carolina | 2020 | 108 | 2.33 | 1.89 | 2.78 | 0.23 |  |
| North Carolina | 2021 | 96 | 2.05 | 1.66 | 2.51 | 0.21 |  |
| North Carolina | 2022 | 117 | 2.58 | 2.11 | 3.05 | 0.24 |  |
| North Carolina | 2023 | 111 | 2.34 | 1.90 | 2.78 | 0.23 |  |
| North Dakota | 1999 | NA | NA | NA | NA | NA |  |
| North Dakota | 2000 | NA | NA | NA | NA | NA |  |
| North Dakota | 2001 | NA | NA | NA | NA | NA |  |
| North Dakota | 2002 | NA | NA | NA | NA | NA |  |
| North Dakota | 2003 | NA | NA | NA | NA | NA |  |
| North Dakota | 2004 | 0 | 0.00 | 0.00 | 0.00 | 0.00 |  |
| North Dakota | 2005 | 0 | 0.00 | 0.00 | 0.00 | 0.00 |  |
| North Dakota | 2006 | NA | NA | NA | NA | NA |  |
| North Dakota | 2007 | NA | NA | NA | NA | NA |  |
| North Dakota | 2008 | NA | NA | NA | NA | NA |  |
| North Dakota | 2009 | NA | NA | NA | NA | NA |  |
| North Dakota | 2010 | NA | NA | NA | NA | NA |  |
| North Dakota | 2011 | NA | NA | NA | NA | NA |  |
| North Dakota | 2012 | NA | NA | NA | NA | NA |  |
| North Dakota | 2013 | NA | NA | NA | NA | NA |  |
| North Dakota | 2014 | NA | NA | NA | NA | NA |  |
| North Dakota | 2015 | NA | NA | NA | NA | NA |  |
| North Dakota | 2016 | NA | NA | NA | NA | NA |  |
| North Dakota | 2017 | NA | NA | NA | NA | NA |  |
| North Dakota | 2018 | NA | NA | NA | NA | NA |  |
| North Dakota | 2019 | NA | NA | NA | NA | NA |  |
| North Dakota | 2020 | NA | NA | NA | NA | NA |  |
| North Dakota | 2021 | 10 | 3.42 | 1.48 | 5.67 | 0.99 |  |
| North Dakota | 2022 | NA | NA | NA | NA | NA |  |
| North Dakota | 2023 | NA | NA | NA | NA | NA |  |
| Ohio | 1999 | 36 | 0.88 | 0.62 | 1.22 | 0.15 |  |
| Ohio | 2000 | 46 | 1.09 | 0.80 | 1.46 | 0.16 |  |
| Ohio | 2001 | 39 | 0.95 | 0.68 | 1.30 | 0.15 |  |
| Ohio | 2002 | 37 | 0.87 | 0.61 | 1.20 | 0.14 |  |
| Ohio | 2003 | 41 | 0.98 | 0.70 | 1.33 | 0.15 |  |
| Ohio | 2004 | 37 | 0.88 | 0.62 | 1.21 | 0.14 |  |
| Ohio | 2005 | 39 | 0.88 | 0.63 | 1.20 | 0.14 |  |
| Ohio | 2006 | 41 | 0.90 | 0.65 | 1.23 | 0.14 |  |
| Ohio | 2007 | 36 | 0.81 | 0.57 | 1.12 | 0.14 |  |
| Ohio | 2008 | 45 | 0.96 | 0.69 | 1.28 | 0.14 |  |
| Ohio | 2009 | 50 | 1.09 | 0.81 | 1.44 | 0.16 |  |
| Ohio | 2010 | 52 | 1.08 | 0.80 | 1.42 | 0.15 |  |
| Ohio | 2011 | 44 | 0.96 | 0.70 | 1.30 | 0.15 |  |
| Ohio | 2012 | 53 | 1.07 | 0.79 | 1.40 | 0.15 |  |
| Ohio | 2013 | 68 | 1.41 | 1.09 | 1.79 | 0.17 |  |
| Ohio | 2014 | 72 | 1.44 | 1.12 | 1.82 | 0.17 |  |
| Ohio | 2015 | 69 | 1.38 | 1.07 | 1.75 | 0.17 |  |
| Ohio | 2016 | 69 | 1.40 | 1.09 | 1.78 | 0.17 |  |
| Ohio | 2017 | 67 | 1.29 | 0.99 | 1.64 | 0.16 |  |
| Ohio | 2018 | 86 | 1.59 | 1.27 | 1.97 | 0.17 |  |
| Ohio | 2019 | 84 | 1.54 | 1.23 | 1.91 | 0.17 |  |
| Ohio | 2020 | 105 | 1.95 | 1.57 | 2.33 | 0.19 |  |
| Ohio | 2021 | 103 | 1.96 | 1.58 | 2.35 | 0.20 |  |
| Ohio | 2022 | 128 | 2.34 | 1.93 | 2.75 | 0.21 |  |
| Ohio | 2023 | 121 | 2.23 | 1.83 | 2.63 | 0.21 |  |
| Oklahoma | 1999 | NA | NA | NA | NA | NA |  |
| Oklahoma | 2000 | NA | NA | NA | NA | NA |  |
| Oklahoma | 2001 | NA | NA | NA | NA | NA |  |
| Oklahoma | 2002 | 10 | 0.85 | 0.37 | 1.42 | 0.24 |  |
| Oklahoma | 2003 | NA | NA | NA | NA | NA |  |
| Oklahoma | 2004 | NA | NA | NA | NA | NA |  |
| Oklahoma | 2005 | NA | NA | NA | NA | NA |  |
| Oklahoma | 2006 | NA | NA | NA | NA | NA |  |
| Oklahoma | 2007 | NA | NA | NA | NA | NA |  |
| Oklahoma | 2008 | NA | NA | NA | NA | NA |  |
| Oklahoma | 2009 | NA | NA | NA | NA | NA |  |
| Oklahoma | 2010 | NA | NA | NA | NA | NA |  |
| Oklahoma | 2011 | 13 | 0.90 | 0.44 | 1.42 | 0.23 |  |
| Oklahoma | 2012 | NA | NA | NA | NA | NA |  |
| Oklahoma | 2013 | NA | NA | NA | NA | NA |  |
| Oklahoma | 2014 | NA | NA | NA | NA | NA |  |
| Oklahoma | 2015 | NA | NA | NA | NA | NA |  |
| Oklahoma | 2016 | NA | NA | NA | NA | NA |  |
| Oklahoma | 2017 | 10 | 0.70 | 0.30 | 1.17 | 0.20 |  |
| Oklahoma | 2018 | 14 | 0.87 | 0.44 | 1.36 | 0.22 |  |
| Oklahoma | 2019 | 25 | 1.54 | 1.00 | 2.27 | 0.31 |  |
| Oklahoma | 2020 | 14 | 0.86 | 0.44 | 1.34 | 0.22 |  |
| Oklahoma | 2021 | 14 | 0.96 | 0.49 | 1.50 | 0.24 |  |
| Oklahoma | 2022 | 14 | 0.89 | 0.45 | 1.38 | 0.22 |  |
| Oklahoma | 2023 | 23 | 1.28 | 0.81 | 1.91 | 0.27 |  |
| Oregon | 1999 | 14 | 1.21 | 0.62 | 1.89 | 0.30 |  |
| Oregon | 2000 | NA | NA | NA | NA | NA |  |
| Oregon | 2001 | NA | NA | NA | NA | NA |  |
| Oregon | 2002 | 12 | 1.03 | 0.49 | 1.67 | 0.28 |  |
| Oregon | 2003 | NA | NA | NA | NA | NA |  |
| Oregon | 2004 | NA | NA | NA | NA | NA |  |
| Oregon | 2005 | 14 | 1.10 | 0.56 | 1.72 | 0.28 |  |
| Oregon | 2006 | 11 | 0.80 | 0.37 | 1.31 | 0.22 |  |
| Oregon | 2007 | 13 | 1.00 | 0.50 | 1.59 | 0.26 |  |
| Oregon | 2008 | 11 | 0.83 | 0.38 | 1.36 | 0.23 |  |
| Oregon | 2009 | 16 | 1.14 | 0.61 | 1.74 | 0.27 |  |
| Oregon | 2010 | NA | NA | NA | NA | NA |  |
| Oregon | 2011 | 20 | 1.31 | 0.80 | 2.03 | 0.30 |  |
| Oregon | 2012 | 15 | 1.02 | 0.53 | 1.56 | 0.25 |  |
| Oregon | 2013 | 19 | 1.22 | 0.69 | 1.84 | 0.27 |  |
| Oregon | 2014 | 22 | 1.28 | 0.79 | 1.96 | 0.28 |  |
| Oregon | 2015 | 22 | 1.32 | 0.82 | 2.02 | 0.29 |  |
| Oregon | 2016 | 20 | 1.14 | 0.69 | 1.79 | 0.26 |  |
| Oregon | 2017 | 30 | 1.69 | 1.13 | 2.43 | 0.31 |  |
| Oregon | 2018 | 47 | 2.48 | 1.81 | 3.30 | 0.37 |  |
| Oregon | 2019 | 37 | 1.94 | 1.36 | 2.69 | 0.32 |  |
| Oregon | 2020 | 53 | 2.79 | 2.08 | 3.66 | 0.39 |  |
| Oregon | 2021 | 54 | 3.00 | 2.24 | 3.92 | 0.41 |  |
| Oregon | 2022 | 78 | 3.95 | 3.12 | 4.94 | 0.45 |  |
| Oregon | 2023 | 89 | 4.49 | 3.60 | 5.54 | 0.48 |  |
| Pennsylvania | 1999 | 46 | 0.88 | 0.64 | 1.17 | 0.13 |  |
| Pennsylvania | 2000 | 37 | 0.71 | 0.50 | 0.98 | 0.12 |  |
| Pennsylvania | 2001 | 33 | 0.64 | 0.44 | 0.90 | 0.11 |  |
| Pennsylvania | 2002 | 32 | 0.62 | 0.42 | 0.88 | 0.11 |  |
| Pennsylvania | 2003 | 44 | 0.82 | 0.59 | 1.10 | 0.12 |  |
| Pennsylvania | 2004 | 53 | 1.02 | 0.76 | 1.34 | 0.14 |  |
| Pennsylvania | 2005 | 35 | 0.68 | 0.47 | 0.94 | 0.12 |  |
| Pennsylvania | 2006 | 30 | 0.58 | 0.39 | 0.83 | 0.11 |  |
| Pennsylvania | 2007 | 34 | 0.65 | 0.45 | 0.92 | 0.11 |  |
| Pennsylvania | 2008 | 52 | 0.97 | 0.72 | 1.27 | 0.14 |  |
| Pennsylvania | 2009 | 42 | 0.78 | 0.55 | 1.06 | 0.12 |  |
| Pennsylvania | 2010 | 56 | 1.01 | 0.76 | 1.31 | 0.14 |  |
| Pennsylvania | 2011 | 45 | 0.79 | 0.57 | 1.06 | 0.12 |  |
| Pennsylvania | 2012 | 62 | 1.11 | 0.85 | 1.42 | 0.14 |  |
| Pennsylvania | 2013 | 50 | 0.90 | 0.66 | 1.18 | 0.13 |  |
| Pennsylvania | 2014 | 54 | 0.91 | 0.68 | 1.18 | 0.12 |  |
| Pennsylvania | 2015 | 64 | 1.10 | 0.84 | 1.41 | 0.14 |  |
| Pennsylvania | 2016 | 77 | 1.27 | 1.00 | 1.60 | 0.15 |  |
| Pennsylvania | 2017 | 87 | 1.44 | 1.15 | 1.79 | 0.16 |  |
| Pennsylvania | 2018 | 93 | 1.43 | 1.15 | 1.75 | 0.15 |  |
| Pennsylvania | 2019 | 119 | 1.88 | 1.54 | 2.23 | 0.17 |  |
| Pennsylvania | 2020 | 140 | 2.22 | 1.85 | 2.60 | 0.19 |  |
| Pennsylvania | 2021 | 152 | 2.40 | 2.01 | 2.79 | 0.20 |  |
| Pennsylvania | 2022 | 185 | 2.86 | 2.44 | 3.27 | 0.21 |  |
| Pennsylvania | 2023 | 209 | 3.22 | 2.78 | 3.66 | 0.23 |  |
| Rhode Island | 1999 | NA | NA | NA | NA | NA |  |
| Rhode Island | 2000 | NA | NA | NA | NA | NA |  |
| Rhode Island | 2001 | NA | NA | NA | NA | NA |  |
| Rhode Island | 2002 | NA | NA | NA | NA | NA |  |
| Rhode Island | 2003 | NA | NA | NA | NA | NA |  |
| Rhode Island | 2004 | NA | NA | NA | NA | NA |  |
| Rhode Island | 2005 | NA | NA | NA | NA | NA |  |
| Rhode Island | 2006 | NA | NA | NA | NA | NA |  |
| Rhode Island | 2007 | NA | NA | NA | NA | NA |  |
| Rhode Island | 2008 | NA | NA | NA | NA | NA |  |
| Rhode Island | 2009 | NA | NA | NA | NA | NA |  |
| Rhode Island | 2010 | NA | NA | NA | NA | NA |  |
| Rhode Island | 2011 | NA | NA | NA | NA | NA |  |
| Rhode Island | 2012 | 13 | 3.19 | 1.57 | 5.04 | 0.83 |  |
| Rhode Island | 2013 | NA | NA | NA | NA | NA |  |
| Rhode Island | 2014 | NA | NA | NA | NA | NA |  |
| Rhode Island | 2015 | 14 | 3.26 | 1.62 | 5.21 | 0.84 |  |
| Rhode Island | 2016 | 14 | 3.17 | 1.58 | 5.08 | 0.81 |  |
| Rhode Island | 2017 | 11 | 2.68 | 1.21 | 4.35 | 0.75 |  |
| Rhode Island | 2018 | 12 | 2.86 | 1.35 | 4.58 | 0.77 |  |
| Rhode Island | 2019 | 24 | 4.86 | 3.08 | 7.30 | 1.01 |  |
| Rhode Island | 2020 | 25 | 4.68 | 3.00 | 6.96 | 0.95 |  |
| Rhode Island | 2021 | 19 | 3.78 | 2.15 | 5.59 | 0.83 |  |
| Rhode Island | 2022 | 19 | 3.54 | 2.02 | 5.25 | 0.78 |  |
| Rhode Island | 2023 | 25 | 4.73 | 3.06 | 6.98 | 0.95 |  |
| South Carolina | 1999 | NA | NA | NA | NA | NA |  |
| South Carolina | 2000 | 12 | 1.00 | 0.48 | 1.61 | 0.27 |  |
| South Carolina | 2001 | 10 | 0.81 | 0.35 | 1.36 | 0.23 |  |
| South Carolina | 2002 | 10 | 0.79 | 0.34 | 1.32 | 0.23 |  |
| South Carolina | 2003 | 13 | 0.99 | 0.49 | 1.57 | 0.26 |  |
| South Carolina | 2004 | NA | NA | NA | NA | NA |  |
| South Carolina | 2005 | NA | NA | NA | NA | NA |  |
| South Carolina | 2006 | 16 | 1.04 | 0.56 | 1.58 | 0.25 |  |
| South Carolina | 2007 | NA | NA | NA | NA | NA |  |
| South Carolina | 2008 | 12 | 0.76 | 0.36 | 1.22 | 0.20 |  |
| South Carolina | 2009 | 15 | 0.99 | 0.52 | 1.52 | 0.24 |  |
| South Carolina | 2010 | 17 | 0.99 | 0.54 | 1.48 | 0.23 |  |
| South Carolina | 2011 | 11 | 0.59 | 0.27 | 0.97 | 0.16 |  |
| South Carolina | 2012 | 17 | 0.94 | 0.51 | 1.45 | 0.22 |  |
| South Carolina | 2013 | 10 | 0.58 | 0.25 | 0.96 | 0.17 |  |
| South Carolina | 2014 | 21 | 1.01 | 0.62 | 1.56 | 0.22 |  |
| South Carolina | 2015 | 13 | 0.67 | 0.32 | 1.09 | 0.18 |  |
| South Carolina | 2016 | 16 | 0.81 | 0.43 | 1.26 | 0.20 |  |
| South Carolina | 2017 | 18 | 0.86 | 0.47 | 1.30 | 0.19 |  |
| South Carolina | 2018 | 21 | 0.93 | 0.57 | 1.44 | 0.21 |  |
| South Carolina | 2019 | 28 | 1.20 | 0.79 | 1.74 | 0.23 |  |
| South Carolina | 2020 | 23 | 0.96 | 0.60 | 1.45 | 0.21 |  |
| South Carolina | 2021 | 38 | 1.57 | 1.10 | 2.16 | 0.26 |  |
| South Carolina | 2022 | 58 | 2.38 | 1.80 | 3.09 | 0.32 |  |
| South Carolina | 2023 | 63 | 2.47 | 1.89 | 3.18 | 0.32 |  |
| South Dakota | 1999 | NA | NA | NA | NA | NA |  |
| South Dakota | 2000 | NA | NA | NA | NA | NA |  |
| South Dakota | 2001 | NA | NA | NA | NA | NA |  |
| South Dakota | 2002 | NA | NA | NA | NA | NA |  |
| South Dakota | 2003 | NA | NA | NA | NA | NA |  |
| South Dakota | 2004 | NA | NA | NA | NA | NA |  |
| South Dakota | 2005 | NA | NA | NA | NA | NA |  |
| South Dakota | 2006 | 0 | 0.00 | 0.00 | 0.00 | 0.00 |  |
| South Dakota | 2007 | NA | NA | NA | NA | NA |  |
| South Dakota | 2008 | NA | NA | NA | NA | NA |  |
| South Dakota | 2009 | NA | NA | NA | NA | NA |  |
| South Dakota | 2010 | NA | NA | NA | NA | NA |  |
| South Dakota | 2011 | NA | NA | NA | NA | NA |  |
| South Dakota | 2012 | NA | NA | NA | NA | NA |  |
| South Dakota | 2013 | NA | NA | NA | NA | NA |  |
| South Dakota | 2014 | NA | NA | NA | NA | NA |  |
| South Dakota | 2015 | NA | NA | NA | NA | NA |  |
| South Dakota | 2016 | NA | NA | NA | NA | NA |  |
| South Dakota | 2017 | NA | NA | NA | NA | NA |  |
| South Dakota | 2018 | 10 | 2.96 | 1.28 | 4.91 | 0.86 |  |
| South Dakota | 2019 | NA | NA | NA | NA | NA |  |
| South Dakota | 2020 | 16 | 4.16 | 2.20 | 6.48 | 1.00 |  |
| South Dakota | 2021 | NA | NA | NA | NA | NA |  |
| South Dakota | 2022 | 17 | 4.42 | 2.42 | 6.65 | 1.02 |  |
| South Dakota | 2023 | 14 | 3.64 | 1.85 | 5.67 | 0.92 |  |
| Tennessee | 1999 | 11 | 0.63 | 0.29 | 1.03 | 0.17 |  |
| Tennessee | 2000 | 26 | 1.32 | 0.86 | 1.93 | 0.26 |  |
| Tennessee | 2001 | 14 | 0.71 | 0.36 | 1.12 | 0.18 |  |
| Tennessee | 2002 | 16 | 0.84 | 0.45 | 1.28 | 0.20 |  |
| Tennessee | 2003 | 20 | 0.98 | 0.60 | 1.52 | 0.22 |  |
| Tennessee | 2004 | 15 | 0.74 | 0.39 | 1.14 | 0.18 |  |
| Tennessee | 2005 | 15 | 0.77 | 0.40 | 1.19 | 0.19 |  |
| Tennessee | 2006 | 20 | 0.86 | 0.52 | 1.32 | 0.19 |  |
| Tennessee | 2007 | 22 | 0.96 | 0.60 | 1.46 | 0.21 |  |
| Tennessee | 2008 | 13 | 0.59 | 0.29 | 0.93 | 0.15 |  |
| Tennessee | 2009 | 15 | 0.67 | 0.35 | 1.04 | 0.16 |  |
| Tennessee | 2010 | 25 | 1.07 | 0.69 | 1.58 | 0.21 |  |
| Tennessee | 2011 | 25 | 0.95 | 0.61 | 1.41 | 0.19 |  |
| Tennessee | 2012 | 15 | 0.59 | 0.31 | 0.91 | 0.14 |  |
| Tennessee | 2013 | 22 | 0.80 | 0.50 | 1.21 | 0.17 |  |
| Tennessee | 2014 | 21 | 0.77 | 0.47 | 1.20 | 0.17 |  |
| Tennessee | 2015 | 20 | 0.71 | 0.43 | 1.11 | 0.16 |  |
| Tennessee | 2016 | 17 | 0.72 | 0.40 | 1.09 | 0.17 |  |
| Tennessee | 2017 | 19 | 0.65 | 0.37 | 0.98 | 0.14 |  |
| Tennessee | 2018 | 24 | 0.82 | 0.52 | 1.23 | 0.17 |  |
| Tennessee | 2019 | 34 | 1.15 | 0.79 | 1.62 | 0.20 |  |
| Tennessee | 2020 | 27 | 0.91 | 0.60 | 1.33 | 0.18 |  |
| Tennessee | 2021 | 47 | 1.57 | 1.15 | 2.09 | 0.23 |  |
| Tennessee | 2022 | 56 | 1.81 | 1.36 | 2.35 | 0.24 |  |
| Tennessee | 2023 | 63 | 2.09 | 1.60 | 2.68 | 0.27 |  |
| Texas | 1999 | 38 | 0.68 | 0.48 | 0.94 | 0.11 |  |
| Texas | 2000 | 52 | 0.89 | 0.67 | 1.17 | 0.12 |  |
| Texas | 2001 | 56 | 0.96 | 0.73 | 1.25 | 0.13 |  |
| Texas | 2002 | 51 | 0.85 | 0.63 | 1.11 | 0.12 |  |
| Texas | 2003 | 44 | 0.70 | 0.51 | 0.94 | 0.11 |  |
| Texas | 2004 | 41 | 0.59 | 0.42 | 0.81 | 0.09 |  |
| Texas | 2005 | 41 | 0.63 | 0.45 | 0.86 | 0.10 |  |
| Texas | 2006 | 48 | 0.71 | 0.52 | 0.95 | 0.10 |  |
| Texas | 2007 | 49 | 0.72 | 0.53 | 0.95 | 0.10 |  |
| Texas | 2008 | 46 | 0.67 | 0.49 | 0.89 | 0.10 |  |
| Texas | 2009 | 45 | 0.57 | 0.41 | 0.76 | 0.09 |  |
| Texas | 2010 | 60 | 0.76 | 0.58 | 0.99 | 0.10 |  |
| Texas | 2011 | 67 | 0.88 | 0.68 | 1.12 | 0.11 |  |
| Texas | 2012 | 64 | 0.76 | 0.58 | 0.98 | 0.10 |  |
| Texas | 2013 | 63 | 0.71 | 0.54 | 0.91 | 0.09 |  |
| Texas | 2014 | 47 | 0.54 | 0.40 | 0.73 | 0.08 |  |
| Texas | 2015 | 58 | 0.64 | 0.49 | 0.83 | 0.09 |  |
| Texas | 2016 | 68 | 0.69 | 0.53 | 0.88 | 0.09 |  |
| Texas | 2017 | 82 | 0.86 | 0.68 | 1.07 | 0.10 |  |
| Texas | 2018 | 94 | 0.95 | 0.77 | 1.17 | 0.10 |  |
| Texas | 2019 | 90 | 0.88 | 0.70 | 1.09 | 0.09 |  |
| Texas | 2020 | 126 | 1.27 | 1.05 | 1.50 | 0.11 |  |
| Texas | 2021 | 116 | 1.17 | 0.95 | 1.39 | 0.11 |  |
| Texas | 2022 | 149 | 1.45 | 1.22 | 1.69 | 0.12 |  |
| Texas | 2023 | 155 | 1.48 | 1.24 | 1.72 | 0.12 |  |
| Utah | 1999 | NA | NA | NA | NA | NA |  |
| Utah | 2000 | NA | NA | NA | NA | NA |  |
| Utah | 2001 | NA | NA | NA | NA | NA |  |
| Utah | 2002 | NA | NA | NA | NA | NA |  |
| Utah | 2003 | NA | NA | NA | NA | NA |  |
| Utah | 2004 | NA | NA | NA | NA | NA |  |
| Utah | 2005 | NA | NA | NA | NA | NA |  |
| Utah | 2006 | NA | NA | NA | NA | NA |  |
| Utah | 2007 | NA | NA | NA | NA | NA |  |
| Utah | 2008 | NA | NA | NA | NA | NA |  |
| Utah | 2009 | 10 | 1.59 | 0.69 | 2.65 | 0.46 |  |
| Utah | 2010 | NA | NA | NA | NA | NA |  |
| Utah | 2011 | NA | NA | NA | NA | NA |  |
| Utah | 2012 | NA | NA | NA | NA | NA |  |
| Utah | 2013 | NA | NA | NA | NA | NA |  |
| Utah | 2014 | NA | NA | NA | NA | NA |  |
| Utah | 2015 | 10 | 1.30 | 0.56 | 2.16 | 0.38 |  |
| Utah | 2016 | NA | NA | NA | NA | NA |  |
| Utah | 2017 | NA | NA | NA | NA | NA |  |
| Utah | 2018 | 10 | 1.19 | 0.52 | 1.98 | 0.34 |  |
| Utah | 2019 | 15 | 1.70 | 0.89 | 2.61 | 0.41 |  |
| Utah | 2020 | 19 | 2.16 | 1.24 | 3.20 | 0.47 |  |
| Utah | 2021 | 30 | 3.24 | 2.17 | 4.65 | 0.60 |  |
| Utah | 2022 | 23 | 2.21 | 1.38 | 3.34 | 0.47 |  |
| Utah | 2023 | 31 | 3.14 | 2.12 | 4.49 | 0.57 |  |
| Vermont | 1999 | NA | NA | NA | NA | NA |  |
| Vermont | 2000 | NA | NA | NA | NA | NA |  |
| Vermont | 2001 | NA | NA | NA | NA | NA |  |
| Vermont | 2002 | NA | NA | NA | NA | NA |  |
| Vermont | 2003 | NA | NA | NA | NA | NA |  |
| Vermont | 2004 | NA | NA | NA | NA | NA |  |
| Vermont | 2005 | 0 | 0.00 | 0.00 | 0.00 | 0.00 |  |
| Vermont | 2006 | NA | NA | NA | NA | NA |  |
| Vermont | 2007 | NA | NA | NA | NA | NA |  |
| Vermont | 2008 | 13 | 5.83 | 2.88 | 9.24 | 1.50 |  |
| Vermont | 2009 | NA | NA | NA | NA | NA |  |
| Vermont | 2010 | NA | NA | NA | NA | NA |  |
| Vermont | 2011 | NA | NA | NA | NA | NA |  |
| Vermont | 2012 | NA | NA | NA | NA | NA |  |
| Vermont | 2013 | NA | NA | NA | NA | NA |  |
| Vermont | 2014 | NA | NA | NA | NA | NA |  |
| Vermont | 2015 | 11 | 4.06 | 1.84 | 6.59 | 1.13 |  |
| Vermont | 2016 | NA | NA | NA | NA | NA |  |
| Vermont | 2017 | NA | NA | NA | NA | NA |  |
| Vermont | 2018 | 13 | 4.53 | 2.23 | 7.17 | 1.17 |  |
| Vermont | 2019 | 16 | 5.61 | 3.01 | 8.55 | 1.33 |  |
| Vermont | 2020 | 12 | 4.37 | 2.07 | 6.99 | 1.18 |  |
| Vermont | 2021 | 28 | 8.80 | 5.80 | 12.80 | 1.68 |  |
| Vermont | 2022 | 21 | 6.57 | 4.07 | 10.05 | 1.45 |  |
| Vermont | 2023 | 21 | 6.23 | 3.86 | 9.52 | 1.37 |  |
| Virginia | 1999 | 19 | 0.89 | 0.51 | 1.31 | 0.19 |  |
| Virginia | 2000 | 12 | 0.56 | 0.27 | 0.91 | 0.15 |  |
| Virginia | 2001 | 10 | 0.49 | 0.21 | 0.82 | 0.14 |  |
| Virginia | 2002 | 21 | 0.91 | 0.56 | 1.39 | 0.20 |  |
| Virginia | 2003 | 19 | 0.88 | 0.51 | 1.31 | 0.19 |  |
| Virginia | 2004 | 17 | 0.75 | 0.42 | 1.14 | 0.17 |  |
| Virginia | 2005 | 19 | 0.79 | 0.45 | 1.16 | 0.17 |  |
| Virginia | 2006 | 29 | 1.09 | 0.73 | 1.58 | 0.20 |  |
| Virginia | 2007 | NA | NA | NA | NA | NA |  |
| Virginia | 2008 | 26 | 1.02 | 0.67 | 1.50 | 0.20 |  |
| Virginia | 2009 | 19 | 0.71 | 0.40 | 1.07 | 0.16 |  |
| Virginia | 2010 | 19 | 0.74 | 0.42 | 1.10 | 0.16 |  |
| Virginia | 2011 | 14 | 0.50 | 0.25 | 0.78 | 0.12 |  |
| Virginia | 2012 | 15 | 0.52 | 0.27 | 0.82 | 0.13 |  |
| Virginia | 2013 | 27 | 0.86 | 0.56 | 1.26 | 0.17 |  |
| Virginia | 2014 | 30 | 0.95 | 0.64 | 1.37 | 0.18 |  |
| Virginia | 2015 | 31 | 0.98 | 0.66 | 1.39 | 0.18 |  |
| Virginia | 2016 | 37 | 1.12 | 0.78 | 1.55 | 0.19 |  |
| Virginia | 2017 | 33 | 1.03 | 0.71 | 1.46 | 0.18 |  |
| Virginia | 2018 | 44 | 1.26 | 0.91 | 1.69 | 0.19 |  |
| Virginia | 2019 | 49 | 1.35 | 0.99 | 1.79 | 0.20 |  |
| Virginia | 2020 | 56 | 1.51 | 1.14 | 1.96 | 0.20 |  |
| Virginia | 2021 | 71 | 2.09 | 1.63 | 2.63 | 0.25 |  |
| Virginia | 2022 | 78 | 2.16 | 1.70 | 2.69 | 0.24 |  |
| Virginia | 2023 | 75 | 1.94 | 1.52 | 2.43 | 0.23 |  |
| Washington | 1999 | 14 | 0.81 | 0.41 | 1.26 | 0.20 |  |
| Washington | 2000 | 16 | 0.90 | 0.49 | 1.38 | 0.21 |  |
| Washington | 2001 | 15 | 0.80 | 0.42 | 1.24 | 0.20 |  |
| Washington | 2002 | 25 | 1.26 | 0.82 | 1.86 | 0.25 |  |
| Washington | 2003 | 24 | 1.22 | 0.78 | 1.82 | 0.25 |  |
| Washington | 2004 | 19 | 0.97 | 0.55 | 1.44 | 0.21 |  |
| Washington | 2005 | 30 | 1.37 | 0.92 | 1.96 | 0.25 |  |
| Washington | 2006 | 30 | 1.35 | 0.90 | 1.93 | 0.25 |  |
| Washington | 2007 | 20 | 0.98 | 0.60 | 1.51 | 0.22 |  |
| Washington | 2008 | 34 | 1.51 | 1.04 | 2.12 | 0.26 |  |
| Washington | 2009 | 26 | 1.06 | 0.69 | 1.56 | 0.21 |  |
| Washington | 2010 | 37 | 1.62 | 1.13 | 2.24 | 0.27 |  |
| Washington | 2011 | 37 | 1.50 | 1.05 | 2.08 | 0.25 |  |
| Washington | 2012 | 30 | 1.18 | 0.79 | 1.70 | 0.22 |  |
| Washington | 2013 | 32 | 1.24 | 0.84 | 1.76 | 0.22 |  |
| Washington | 2014 | 33 | 1.25 | 0.85 | 1.76 | 0.22 |  |
| Washington | 2015 | 42 | 1.52 | 1.09 | 2.08 | 0.24 |  |
| Washington | 2016 | 55 | 1.92 | 1.44 | 2.51 | 0.26 |  |
| Washington | 2017 | 66 | 2.23 | 1.71 | 2.84 | 0.28 |  |
| Washington | 2018 | 84 | 2.90 | 2.31 | 3.60 | 0.32 |  |
| Washington | 2019 | 92 | 3.02 | 2.43 | 3.72 | 0.32 |  |
| Washington | 2020 | 90 | 2.86 | 2.30 | 3.53 | 0.31 |  |
| Washington | 2021 | 102 | 3.43 | 2.76 | 4.10 | 0.34 |  |
| Washington | 2022 | 129 | 4.09 | 3.38 | 4.80 | 0.36 |  |
| Washington | 2023 | 123 | 3.77 | 3.10 | 4.45 | 0.34 |  |
| West Virginia | 1999 | NA | NA | NA | NA | NA |  |
| West Virginia | 2000 | NA | NA | NA | NA | NA |  |
| West Virginia | 2001 | NA | NA | NA | NA | NA |  |
| West Virginia | 2002 | NA | NA | NA | NA | NA |  |
| West Virginia | 2003 | NA | NA | NA | NA | NA |  |
| West Virginia | 2004 | NA | NA | NA | NA | NA |  |
| West Virginia | 2005 | NA | NA | NA | NA | NA |  |
| West Virginia | 2006 | NA | NA | NA | NA | NA |  |
| West Virginia | 2007 | 10 | 1.41 | 0.61 | 2.35 | 0.41 |  |
| West Virginia | 2008 | NA | NA | NA | NA | NA |  |
| West Virginia | 2009 | NA | NA | NA | NA | NA |  |
| West Virginia | 2010 | NA | NA | NA | NA | NA |  |
| West Virginia | 2011 | NA | NA | NA | NA | NA |  |
| West Virginia | 2012 | NA | NA | NA | NA | NA |  |
| West Virginia | 2013 | NA | NA | NA | NA | NA |  |
| West Virginia | 2014 | NA | NA | NA | NA | NA |  |
| West Virginia | 2015 | NA | NA | NA | NA | NA |  |
| West Virginia | 2016 | NA | NA | NA | NA | NA |  |
| West Virginia | 2017 | 11 | 1.33 | 0.60 | 2.16 | 0.37 |  |
| West Virginia | 2018 | NA | NA | NA | NA | NA |  |
| West Virginia | 2019 | 11 | 1.23 | 0.56 | 2.01 | 0.34 |  |
| West Virginia | 2020 | NA | NA | NA | NA | NA |  |
| West Virginia | 2021 | 10 | 1.22 | 0.53 | 2.02 | 0.35 |  |
| West Virginia | 2022 | NA | NA | NA | NA | NA |  |
| West Virginia | 2023 | NA | NA | NA | NA | NA |  |
| Wisconsin | 1999 | 16 | 0.89 | 0.48 | 1.35 | 0.21 |  |
| Wisconsin | 2000 | NA | NA | NA | NA | NA |  |
| Wisconsin | 2001 | 14 | 0.75 | 0.38 | 1.18 | 0.19 |  |
| Wisconsin | 2002 | 20 | 1.02 | 0.62 | 1.58 | 0.23 |  |
| Wisconsin | 2003 | 21 | 1.03 | 0.63 | 1.57 | 0.22 |  |
| Wisconsin | 2004 | 17 | 0.91 | 0.50 | 1.38 | 0.21 |  |
| Wisconsin | 2005 | 11 | 0.58 | 0.27 | 0.95 | 0.16 |  |
| Wisconsin | 2006 | 18 | 0.92 | 0.52 | 1.38 | 0.21 |  |
| Wisconsin | 2007 | 13 | 0.63 | 0.31 | 1.00 | 0.16 |  |
| Wisconsin | 2008 | 15 | 0.70 | 0.37 | 1.08 | 0.17 |  |
| Wisconsin | 2009 | 18 | 0.88 | 0.50 | 1.32 | 0.20 |  |
| Wisconsin | 2010 | 14 | 0.68 | 0.35 | 1.06 | 0.17 |  |
| Wisconsin | 2011 | 21 | 0.86 | 0.53 | 1.33 | 0.19 |  |
| Wisconsin | 2012 | 25 | 1.03 | 0.66 | 1.53 | 0.21 |  |
| Wisconsin | 2013 | 26 | 1.12 | 0.73 | 1.63 | 0.22 |  |
| Wisconsin | 2014 | 36 | 1.50 | 1.05 | 2.09 | 0.25 |  |
| Wisconsin | 2015 | 38 | 1.50 | 1.05 | 2.06 | 0.25 |  |
| Wisconsin | 2016 | 38 | 1.50 | 1.05 | 2.06 | 0.25 |  |
| Wisconsin | 2017 | 36 | 1.41 | 0.98 | 1.96 | 0.24 |  |
| Wisconsin | 2018 | 50 | 1.84 | 1.36 | 2.44 | 0.26 |  |
| Wisconsin | 2019 | 56 | 2.08 | 1.57 | 2.71 | 0.28 |  |
| Wisconsin | 2020 | 71 | 2.62 | 2.04 | 3.31 | 0.31 |  |
| Wisconsin | 2021 | 70 | 2.69 | 2.09 | 3.41 | 0.33 |  |
| Wisconsin | 2022 | 91 | 3.30 | 2.65 | 4.06 | 0.35 |  |
| Wisconsin | 2023 | 110 | 4.06 | 3.29 | 4.83 | 0.39 |  |
| Wyoming | 1999 | NA | NA | NA | NA | NA |  |
| Wyoming | 2000 | NA | NA | NA | NA | NA |  |
| Wyoming | 2001 | NA | NA | NA | NA | NA |  |
| Wyoming | 2002 | NA | NA | NA | NA | NA |  |
| Wyoming | 2003 | NA | NA | NA | NA | NA |  |
| Wyoming | 2004 | NA | NA | NA | NA | NA |  |
| Wyoming | 2005 | NA | NA | NA | NA | NA |  |
| Wyoming | 2006 | 0 | 0 | 0 | 0 | 0 |  |
| Wyoming | 2007 | NA | NA | NA | NA | NA |  |
| Wyoming | 2008 | NA | NA | NA | NA | NA |  |
| Wyoming | 2009 | NA | NA | NA | NA | NA |  |
| Wyoming | 2010 | NA | NA | NA | NA | NA |  |
| Wyoming | 2011 | NA | NA | NA | NA | NA |  |
| Wyoming | 2012 | NA | NA | NA | NA | NA |  |
| Wyoming | 2013 | NA | NA | NA | NA | NA |  |
| Wyoming | 2014 | NA | NA | NA | NA | NA |  |
| Wyoming | 2015 | NA | NA | NA | NA | NA |  |
| Wyoming | 2016 | NA | NA | NA | NA | NA |  |
| Wyoming | 2017 | NA | NA | NA | NA | NA |  |
| Wyoming | 2018 | NA | NA | NA | NA | NA |  |
| Wyoming | 2019 | NA | NA | NA | NA | NA |  |
| Wyoming | 2020 | NA | NA | NA | NA | NA |  |
| Wyoming | 2021 | NA | NA | NA | NA | NA |  |
| Wyoming | 2022 | NA | NA | NA | NA | NA |  |
| Wyoming | 2023 | NA | NA | NA | NA | NA |  |
| Abbreviations: AAMR, age-adjusted mortality rate; CVD, cardiovascular disease; CI, confidence interval; SE, standard error. | | | | | | | |
| Note: Age-adjusted mortality rates (AAMRs) are expressed per 100,000 population and standardized to the 2000 U.S. standard population.  NA: Not Applicable | | | | | | | |
| Cells with fewer than 10 deaths were suppressed in accordance with CDC WONDER data use restrictions and are reported as NA. | | | | | | | |
| Mortality rates were not calculated for years with zero reported deaths. | | | | |  |  |  |
| Estimates based on small numbers should be interpreted with caution due to statistical instability. | | | | | | | |

| **Supplemental Table 9**. ARIMA Model–Based Projections of Age-Adjusted Cardiovascular Disease–Related Mortality Rates Among Adults With Amyloidosis in the United States, 2024–2033 | | | | | |
| --- | --- | --- | --- | --- | --- |
| **Year** | **Point Forecast (per 100,000)** | **95% CI Lower** | **95% CI Upper** |  |  |
| 2024 | 2.44 | 2.28 | 2.59 |  |  |
| 2025 | 2.61 | 2.35 | 2.87 |  |  |
| 2026 | 2.78 | 2.40 | 3.15 |  |  |
| 2027 | 2.94 | 2.45 | 3.44 |  |  |
| 2028 | 3.11 | 2.49 | 3.74 |  |  |
| 2029 | 3.28 | 2.52 | 4.04 |  |  |
| 2030 | 3.45 | 2.55 | 4.36 |  |  |
| 2031 | 3.62 | 2.57 | 4.68 |  |  |
| 2032 | 3.79 | 2.57 | 5.01 |  |  |
| 2033 | 3.96 | 2.58 | 5.35 |  |  |
| Abbreviations: ARIMA, Autoregressive Integrated Moving Average; CI, confidence interval. | | | | | |
| Note: Ten-year projections (2024–2033) were generated using an ARIMA (0,2,1) model fitted to observed AAMRs from 1999–2023. | | | | | |
| Reported 95% confidence intervals reflect forecast uncertainty. Projected rates are per 100,000 population, age-adjusted to the 2000 U.S. standard population. | | | | | |
